# Supplementary material for: DNA barcoding for biodiversity assessment: Croatian stoneflies (Insecta: Plecoptera)
Source: PeerJ. 2022 Apr 20;10:e13213. doi: 10.7717/peerj.13213 (PMC9034701; doi:10.7717/peerj.13213)
Supplement: Supplemental Information 7 — The information comprises BOLD IDs, GenBank accession numbers, BINs, Collection inventory numbers (ID; CNHM–Croatian Natural History Museum; CPSH–Collection of Plecoptera Sivec & Hlebec), species clade numbers indicating clades correspond to those in Fig. 2, families, names of taxa after morphological examination, collection dates and sampling sites. Abbreviations: Leg., legit; Det., determinavit. [file peerj-10-13213-s007.xlsx]

## Sheet: Sheet1
BOLD ID	GenBank Acc. No. COI	BIN	Museum/Collection ID	Species clade No. in Figure 2	Family	Morphologically identified taxa	Leg.	Det.	Collection date	Country	Exact site	Latitude	Longitude
CROPL002-21	OK316366	BOLD:ACL7184	CNHM/CPSH44	1	Leuctridae	Leuctra hippopus Kempny, 1899	I. Sivec	I. Sivec	2019-02-28	Croatia	Zavrh, Kupa River	45.523	14.944
CROPL048-21	OK316269	BOLD:ACL7184	CNHM/CPSH90	1	Leuctridae	Leuctra hippopus Kempny, 1899	I. Sivec	I. Sivec	2015-04-10	Croatia	Plitvice Lakes, Riječica Stream	44.839	15.578
CROPL052-21	OK316217	BOLD:ACL7184	CNHM/CPSH93	1	Leuctridae	Leuctra hippopus Kempny, 1899	I. Sivec	I. Sivec	2015-04-10	Croatia	Plitvice Lakes, Riječica Stream	44.839	15.578
CROPL101-21	OK316404	BOLD:ACL7184	CNHM/CPSH140	1	Leuctridae	Leuctra hippopus Kempny, 1899	I. Sivec	I. Sivec	2019-05-02	Croatia	Čabranka River, spring	45.601	14.64
CROPL105-21	OK316263	BOLD:ACL7184	CNHM/CPSH144	1	Leuctridae	Leuctra hippopus Kempny, 1899	I. Sivec	I. Sivec	2019-05-02	Croatia	Gerovčica, spring	45.528	14.677
CROPL140-21	OK316400	BOLD:ACL7184	CNHM/CPSH177	1	Leuctridae	Leuctra hippopus Kempny, 1899	I. Sivec	I. Sivec	2019-04-13	Croatia	Vučjak Kamenski, Brzaja Stream	45.489	17.561
CROPL141-21	OK316476	BOLD:ACL7184	CNHM/CPSH178	1	Leuctridae	Leuctra hippopus Kempny, 1899	I. Sivec	I. Sivec	2019-04-13	Croatia	Vučjak Kamenski, Brzaja Stream	45.489	17.561
CROPL206-21	OK316482	BOLD:AEH4770	CNHM/CPSH240	1	Leuctridae	Leuctra hippopus Kempny, 1899	M. Kučinić	I. Sivec	2015-04-02	Croatia	Konavle, Ljuta River, spring	42.538	18.379
CROPL271-21	OK316474	BOLD:ACL7184	CNHM/CPSH293	1	Leuctridae	Leuctra hippopus Kempny, 1899	D. Hlebec	I. Sivec	2021-02-26	Croatia	Kusonje, Papuk	45.457	17.226
CROPL274-21	OK316319	BOLD:ACL7184	CNHM/CPSH296	1	Leuctridae	Leuctra hippopus Kempny, 1899	D. Hlebec	I. Sivec	2021-02-26	Croatia	Mioči, Orljava River	45.447	17.471
CROPL278-21	OK316418	BOLD:ACL7184	CNHM/CPSH300	1	Leuctridae	Leuctra hippopus Kempny, 1899	D. Hlebec	I. Sivec	2021-02-26	Croatia	Papuk, Slatinski Drenovac, Šumetlica	45.567	17.732
CROPL279-21	OK316157	BOLD:ACL7184	CNHM/CPSH301	1	Leuctridae	Leuctra hippopus Kempny, 1899	D. Hlebec	I. Sivec	2021-02-26	Croatia	Papuk, Slatinski Drenovac, Šumetlica	45.567	17.732
CROPL041-21	OK316298	BOLD:AEH6550	CNHM/CPSH83	2	Leuctridae	Leuctra nigra (Olivier, 1811)	I. Sivec	I. Sivec	2007-06-04	Croatia	Plitvice Lakes, Bijela rijeka spring	44.839	15.578
CROPL071-21	OK316197	BOLD:AEH6550	CNHM/CPSH111	2	Leuctridae	Leuctra nigra (Olivier, 1811)	I. Sivec	I. Sivec	2015-04-10	Croatia	Plitvice Lakes, Riječica Stream	44.839	15.578
CROPL092-21	OK316324	BOLD:AEH6550	CNHM/CPSH131	2	Leuctridae	Leuctra nigra (Olivier, 1811)	I. Sivec	I. Sivec	2015-04-10	Croatia	Plitvice Lakes, Riječica Stream	44.839	15.578
CROPL125-21	OK316357	BOLD:AEH6550	CNHM/CPSH162	2	Leuctridae	Leuctra nigra (Olivier, 1811)	I. Sivec	I. Sivec	2019-06-20	Croatia	Plitvice Lakes, Drakulić rijeka, spring	44.781	15.658
CROPL129-21	OK316477	BOLD:AEH6550	CNHM/CPSH166	2	Leuctridae	Leuctra nigra (Olivier, 1811)	I. Sivec	I. Sivec	2019-06-21	Croatia	Dretulja, spring	45.075	15.343
CROPL142-21	OK316307	BOLD:AEH6550	CNHM/CPSH179	2	Leuctridae	Leuctra nigra (Olivier, 1811)	I. Sivec	I. Sivec	2019-04-13	Croatia	Vučjak Kamenski, Brzaja Stream	45.489	17.561
CROPL143-21	OK316195	BOLD:AEH6550	CNHM/CPSH180	2	Leuctridae	Leuctra nigra (Olivier, 1811)	I. Sivec	I. Sivec	2019-04-13	Croatia	Vučjak Kamenski, Brzaja Stream	45.489	17.561
CROPL201-21	OK316178	BOLD:AAK8667	CNHM/CPSH235	3	Leuctridae	Leuctra inermis Kempny, 1899	I. Sivec	I. Sivec	2010-05-20	Croatia	Hrvatsko, Kupa River	45.534	14.708
CROPL130-21	OK316236	BOLD:AEF4256	CNHM/CPSH167	4	Leuctridae	Leuctra cf. inermis	I. Sivec	I. Sivec	2019-06-20	Croatia	Plitvice Lakes, Crna rijeka	44.836	15.608
CROPL210-21	OK316189	BOLD:ACB1946	CNHM/CPSH244	5	Leuctridae	Leuctra rauscheri Aubert, 1957	I. Sivec	I. Sivec	2010-05-15	Croatia	Hrvatsko, Kupa River	45.534	14.708
CROPL211-21	OK316188	BOLD:ACB1946	CNHM/CPSH245	5	Leuctridae	Leuctra rauscheri Aubert, 1957	I. Sivec	I. Sivec	2010-04-17	Slovenia	Solčava, Markov Kot, Jezera Stream	46.409	14.615
CROPL248-21	OK316462	BOLD:AEK8671	CNHM/CPSH272	6	Leuctridae	Leuctra sp. Z	D. Hlebec	I. Sivec	2021-11-18	Croatia	Žumberak, Slapnica Stream	45.753	15.335
CROPL282-21	OK316338	BOLD:AEK9506	CNHM/CPSH304	7	Leuctridae	Leuctra cf. prima	D. Hlebec	I. Sivec	2021-03-09	Croatia	Ivanovica Stream	45.612	17.514
CROPL325-21	OK316467	BOLD:AEK9506	CNHM/CPSH346	7	Leuctridae	Leuctra cf. prima	I. Sivec	I. Sivec	2019-03-13	Croatia	Plitvice Lakes, Bijela rijeka spring	44.839	15.578
CROPL326-21	OK316160	BOLD:AEK9506	CNHM/CPSH347	7	Leuctridae	Leuctra cf. prima	I. Sivec	I. Sivec	2019-03-16	Croatia	Plitvice Lakes, Bijela rijeka spring	44.839	15.578
CROPL003-21	OK316225	BOLD:ACB1947	CNHM/CPSH45	8	Leuctridae	Leuctra prima Kempny, 1899	I. Sivec	I. Sivec	2019-02-28	Croatia	Suhor, Kupa River	45.489	14.8
CROPL016-21	OK316386	BOLD:ACB1947	CNHM/CPSH58	8	Leuctridae	Leuctra prima Kempny, 1899	I. Sivec	I. Sivec	2015-02-28	Croatia	Medvednica, Bistra Stream	45.938	15.928
CROPL023-21	OK316280	BOLD:ACB1947	CNHM/CPSH65	8	Leuctridae	Leuctra prima Kempny, 1899	I. Sivec	I. Sivec	2015-02-28	Croatia	Medvednica, Bistra Stream	45.938	15.928
CROPL233-21	OK316348	BOLD:ACL9031	CNHM/CPSH266	9	Leuctridae	Leuctra hirsuta Bogoescu & Tabacaru, 1960	I. Sivec	I. Sivec	2021-10-06	Croatia	Zrinska gora, Petrinjčica Stream	45.246	16.275
CROPL131-21	OK316251	BOLD:AEH3840	CNHM/CPSH168	10	Leuctridae	Leuctra bronislawi Sowa, 1970	I. Sivec	I. Sivec	2019-11-29	Croatia	Velika, Veličanka River	45.484	17.648
CROPL132-21	OK316340	BOLD:AEH3840	CNHM/CPSH169	10	Leuctridae	Leuctra bronislawi Sowa, 1970	I. Sivec	I. Sivec	2019-11-29	Croatia	Velika, Veličanka River	45.484	17.648
CROPL135-21	OK316376	BOLD:AEH4984	CNHM/CPSH172	11	Leuctridae	Leuctra cingulata Kempny, 1899	I. Sivec	I. Sivec	2021-11-29	Croatia	Velika, Dubočanka Stream	45.482	17.662
CROPL079-21	OK316173	BOLD:AAN1944	CNHM/CPSH119	12	Leuctridae	Leuctra major Brinck, 1949	I. Sivec	I. Sivec	2014-10-30	Croatia	Bjelolasica, Jesenička rijeka, spring	45.256	15.009
CROPL082-21	OK316205	BOLD:AAN1944	CNHM/CPSH122	12	Leuctridae	Leuctra major Brinck, 1949	I. Sivec	I. Sivec	2014-10-30	Croatia	Bjelolasica, Jesenička rijeka, spring	45.256	15.009
CROPL136-21	OK316478	BOLD:AAK8671	CNHM/CPSH173	13	Leuctridae	Leuctra digitata Kempny, 1899	I. Sivec	I. Sivec	2019-11-21	Croatia	Voćin, Djedovica Stream	45.602	17.662
CROPL094-21	OK316192	BOLD:ACY3863	CNHM/CPSH133	14	Leuctridae	Leuctra fusca (Linnaeus, 1758)	I. Sivec	I. Sivec	2014-10-19	Croatia	Cerovac Vukmanićki, Korana River	45.427	15.609
CROPL096-21	OK316321	BOLD:ACY3863	CNHM/CPSH135	14	Leuctridae	Leuctra fusca (Linnaeus, 1758)	I. Sivec	I. Sivec	2014-10-19	Croatia	Cerovac Vukmanićki, Korana River	45.427	15.609
CROPL137-21	OK316273	BOLD:AAE6442	CNHM/CPSH174	14	Leuctridae	Leuctra fusca (Linnaeus, 1758)	I. Sivec	I. Sivec	2019-11-22	Croatia	Mioči, Orljava River	45.447	17.471
CROPL138-21	OK316431	BOLD:ACY3863	CNHM/CPSH175	14	Leuctridae	Leuctra fusca (Linnaeus, 1758)	I. Sivec	I. Sivec	2019-11-22	Croatia	Mioči, Orljava River	45.447	17.471
CROPL158-21	OK316198	BOLD:ACY3863	CNHM/CPSH195	14	Leuctridae	Leuctra fusca (Linnaeus, 1758)	I. Sivec	I. Sivec	2019-10-13	Croatia	Štefanci, Kupa River	45.492	15.057
CROPL159-21	OK316228	BOLD:ACY3863	CNHM/CPSH196	14	Leuctridae	Leuctra fusca (Linnaeus, 1758)	I. Sivec	I. Sivec	2019-10-13	Croatia	Štefanci, Kupa River	45.492	15.057
CROPL167-21	OK316383	BOLD:ACY3863	CNHM/CPSH204	14	Leuctridae	Leuctra fusca (Linnaeus, 1758)	D. Hlebec	I. Sivec	2019-10-27	Croatia	Plitvice Stream	44.902	15.574
CROPL168-21	OK316468	BOLD:ACY3863	CNHM/CPSH205	14	Leuctridae	Leuctra fusca (Linnaeus, 1758)	D. Hlebec	I. Sivec	2019-10-27	Croatia	Plitvice Lakes, Drakulić rijeka, spring	44.781	15.658
CROPL004-21	OK316352	BOLD:AEH5504	CNHM/CPSH46	15	Leuctridae	Leuctra albida Kempny, 1899	I. Sivec	I. Sivec	2019-02-28	Croatia	Zavrh, Kupa River	45.523	14.944
CROPL057-21	OK316465	BOLD:AAM4011	CNHM/CPSH98	15	Leuctridae	Leuctra albida Kempny, 1899	I. Sivec	I. Sivec	2011-10-30	Croatia	Čabranka River, spring	45.601	14.64
CROPL074-21	OK316406	BOLD:AAM4011	CNHM/CPSH114	15	Leuctridae	Leuctra albida Kempny, 1899	I. Sivec	I. Sivec	2011-10-30	Croatia	Čabranka River, spring	45.601	14.64
CROPL133-21	OK316441	BOLD:AEH5504	CNHM/CPSH170	15	Leuctridae	Leuctra albida Kempny, 1899	I. Sivec	I. Sivec	2019-11-29	Croatia	Velika, Dubočanka Stream	45.482	17.662
CROPL134-21	OK316183	BOLD:AEH5504	CNHM/CPSH171	15	Leuctridae	Leuctra albida Kempny, 1899	I. Sivec	I. Sivec	2019-11-29	Croatia	Velika, Dubočanka Stream	45.482	17.662
CROPL199-21	OK316182	BOLD:AEH5502	CNHM/CPSH233	16	Leuctridae	Leuctra mortoni Kempny, 1899	I. Sivec	I. Sivec	2009-10-31	Slovenia	Kranjska gora, Velika Pišnica	46.47	13.784
CROPL054-21	OK316162	BOLD:AAY9051	CNHM/CPSH95	17	Leuctridae	Leuctra sp.	I. Sivec	I. Sivec	2007-10-14	Croatia	Preočki most, Cetina River	43.968	16.431
CROPL059-21	OK316244	BOLD:AAY9051	CNHM/CPSH100	17	Leuctridae	Leuctra sp.	I. Sivec	I. Sivec	2007-10-14	Croatia	Preočki most, Cetina River	43.966	16.431
CROPL157-21	OK316409	BOLD:AAY9051	CNHM/CPSH194	17	Leuctridae	Leuctra sp.	I. Sivec	I. Sivec	2019-10-13	Croatia	Čabar, Gerovčica spring	45.528	14.677
CROPL165-21	OK316264	BOLD:AAY9051	CNHM/CPSH202	17	Leuctridae	Leuctra sp.	I. Sivec	I. Sivec	2019-10-13	Croatia	Gerovčica, spring	45.528	14.677
CROPL171-21	OK316249	BOLD:AAY9051	CNHM/CPSH208	17	Leuctridae	Leuctra sp.	D. Hlebec	I. Sivec	2019-10-25	Croatia	Cetina River, Preočani spring	43.968	16.431
CROPL172-21	OK316347	BOLD:AAY9051	CNHM/CPSH209	17	Leuctridae	Leuctra sp.	D. Hlebec	I. Sivec	2019-10-25	Croatia	Cetina River, Preočani spring	43.968	16.431
CROPL173-21	OK316396	BOLD:AAY9051	CNHM/CPSH210	17	Leuctridae	Leuctra sp.	D. Hlebec	I. Sivec	2019-10-25	Croatia	Cetina River, Preočani spring	43.968	16.431
CROPL175-21	OK316417	BOLD:AAY9051	CNHM/CPSH212	17	Leuctridae	Leuctra sp.	D. Hlebec	I. Sivec	2019-10-25	Croatia	Cetina River, Glavaš spring	43.977	16.429
CROPL176-21	OK316382	BOLD:AAY9051	CNHM/CPSH213	17	Leuctridae	Leuctra sp.	D. Hlebec	I. Sivec	2019-10-25	Croatia	Cetina River, Glavaš spring	43.977	16.429
CROPL177-21	OK316299	BOLD:AAY9051	CNHM/CPSH214	17	Leuctridae	Leuctra sp.	D. Hlebec	I. Sivec	2019-10-25	Croatia	Cetina River, Glavaš spring	43.977	16.429
CROPL200-21	OK316161	BOLD:AAY9051	CNHM/CPSH234	17	Leuctridae	Leuctra sp.	I. Sivec	I. Sivec	2009-10-07	Croatia	Mala Lesnica, Kupica spring	45.445	14.853
CROPL209-21	OK316327	BOLD:ACB5439	CNHM/CPSH243	18	Chloroperlidae	Xanthoperla apicalis (Newman, 1836)	I. Sivec	I. Sivec	2014-05-20	Croatia	Donja Dubrava, Drava River	46.314	16.789
CROPL207-21	OK316245	BOLD:ACE7203	CNHM/CPSH241	19	Chloroperlidae	Siphonoperla taurica (Pictet, 1841)	D. Hlebec	I. Sivec	2020-04-25	Croatia	Novakovec, Mura River	46.469	16.585
CROPL331-21	OK316176	BOLD:AEL4945	CNHM/CPSH351	20	Chloroperlidae	Siphonoperla torrentium (Pictet, 1841)	D. Hlebec	I. Sivec	2021-06-04	Croatia	Jankovac, Jankovački potok	45.519	17.669
CROPL347-21	OK316367	BOLD:AEL4945	CNHM/CPSH367	20	Chloroperlidae	Siphonoperla torrentium (Pictet, 1841)	D. Hlebec	I. Sivec	2021-06-02	Croatia	Velika, Dubočanka Stream	45.482	17.662
CROPL355-21	OK316353	BOLD:ACW4344	CNHM/CPSH375	21	Perlidae	Marthamea vitripennis (Burmeister, 1839)	D. Hlebec	I. Sivec	2021-06-03	Croatia	Hrvatska dubica, Una River	45.197	16.769
CROPL268-21	OK316436	BOLD:AEK9884	CNHM/CPSH290	22	Perlidae	Agnetina elegantula (Klapálek, 1905)	D. Hlebec	I. Sivec	2021-02-26	Croatia	Čačinci, Vojlovica River	45.6	17.881
CROPL072-21	OK316223	BOLD:AAL0965	CNHM/CPSH112	23	Perlidae	Dinocras megacephala (Klapálek, 1907)	I. Sivec	I. Sivec	2009-06-15	Croatia	Kupa River, spring	45.49	14.69
CROPL085-21	OK316479	BOLD:AAL0965	CNHM/CPSH125	23	Perlidae	Dinocras megacephala (Klapálek, 1907)	I. Sivec	I. Sivec	2010-06-18	Croatia	Kupa River, spring	45.49	14.69
CROPL118-21	OK316328	BOLD:AAL0965	CNHM/CPSH155	23	Perlidae	Dinocras megacephala (Klapálek, 1907)	I. Sivec	I. Sivec	2019-06-22	Croatia	Ruda, spring	43.674	16.793
CROPL179-21	OK316300	BOLD:AAL0965	CNHM/CPSH216	23	Perlidae	Dinocras megacephala (Klapálek, 1907)	A. Delić, G. Čeple, M. Kučinić	I. Sivec	2018-05-10	Croatia	Knin, HE Miljacka, Krka River	44.002	16.019
CROPL194-21	OK316206	BOLD:AAL0965	CNHM/CPSH228	23	Perlidae	Dinocras megacephala (Klapálek, 1907)	I. Sivec	I. Sivec	2009-06-18	Croatia	Kupa River, spring	45.49	14.69
CROPL237-21	OK316425	BOLD:AAL0965	CNHM/CPSH267	23	Perlidae	Dinocras megacephala (Klapálek, 1907)	I. Sivec	I. Sivec	2009-06-18	Croatia	Kupa River, spring	45.49	14.69
CROPL238-21	OK316358	BOLD:AAL0965	CNHM/CPSH268	23	Perlidae	Dinocras megacephala (Klapálek, 1907)	I. Sivec	I. Sivec	2019-06-19	Croatia	Mala Lesnica, Kupica spring	45.445	14.853
CROPL327-21	OK316151	BOLD:AAL0965	CNHM/CPSH348	23	Perlidae	Dinocras megacephala (Klapálek, 1907)	I. Sivec	I. Sivec	2012-05-31	Croatia	Roški slap, Krka River	43.903	15.976
CROPL350-21	OK316485	BOLD:AAL0965	CNHM/CPSH370	23	Perlidae	Dinocras megacephala (Klapálek, 1907)	D. Hlebec	I. Sivec	2021-05-30	Croatia	Ruda, spring	43.674	16.793
CROPL086-21	OK316370	BOLD:AAN1933	CNHM/CPSH126	24	Perlidae	Perla carantana Sivec & Graf, 2002	I. Sivec	I. Sivec	2010-05-20	Croatia	Plemenitaš, Kupa River	45.462	15.096
CROPL087-21	OK316152	BOLD:AAN1933	CNHM/CPSH127	24	Perlidae	Perla carantana Sivec & Graf, 2003	I. Sivec	I. Sivec	2010-05-20	Croatia	Plemenitaš, Kupa River	45.462	15.096
CROPL247-21	OK316326	BOLD:AEH4045	CNHM/CPSH271	25	Perlidae	Perla burmeisteriana Claassen, 1936	I. Sivec	I. Sivec	2015-05-28	Slovenia	Ložnica	46.3	15.239
CROPL313-21	OK316333	BOLD:AEH4045	CNHM/CPSH334	26	Perlidae	Perla illiesi Braasch & Joost, 1973	N. Tvrtković	I. Sivec	2021-04-25	Croatia	Mala Plana	44.643	15.179
CROPL328-21	OK316369	BOLD:AEH4045	CNHM/CPSH349	26	Perlidae	Perla illiesi Braasch & Joost, 1973	N. Tvrtković, M. Vuković	I. Sivec	2021-05-26	Croatia	Deringaj, Otuča	44.35	15.876
CROPL090-21	OK316442	BOLD:AAL2357	CNHM/CPSH129	27	Perlidae	Perla pallida Guérin-Méneville, 1838	I. Sivec	I. Sivec	2005-06-21	Croatia	Čikotina lađa, Cetina River	43.533	16.745
CROPL204-21	OK316378	BOLD:AEB9929	CNHM/CPSH238	27	Perlidae	Perla pallida Guérin-Méneville, 1838	I. Sivec	I. Sivec	2018-06-04	Slovenia	Zgornja Besnica, Besnica Stream	46.019	14.716
CROPL320-21	OK316210	BOLD:AAL2357	CNHM/CPSH341	27	Perlidae	Perla pallida Guérin-Méneville, 1838	I. Sivec	I. Sivec	2012-06-02	Croatia	Butižnica	44.231	16.217
CROPL337-21	OK316360	BOLD:AEB9929	CNHM/CPSH357	27	Perlidae	Perla pallida Guérin-Méneville, 1838	D. Hlebec	I. Sivec	2021-06-02	Croatia	Buinjski rijeka	45.079	16.334
CROPL367-21	OK316153	BOLD:AEB9929	CNHM/CPSH387	27	Perlidae	Perla pallida Guérin-Méneville, 1838	L. Klatarić	I. Sivec	2021-06-25	Croatia	Ivanščica, Šumi Stream	46.189	16.157
CROPL369-21	OK316222	BOLD:AEB9929	CNHM/CPSH389	27	Perlidae	Perla pallida Guérin-Méneville, 1838	L. Klatarić	I. Sivec	2021-06-25	Croatia	Ivanščica, Šumi Stream	46.189	16.157
CROPL371-21	OK316420	BOLD:AEB9929	CNHM/CPSH391	27	Perlidae	Perla pallida Guérin-Méneville, 1838	L. Klatarić	I. Sivec	2021-06-25	Croatia	Ivanščica, Šumi Stream	46.189	16.157
CROPL084-21	OK316314	BOLD:AAL2357	CNHM/CPSH124	28	Perlidae	Perla marginata (Panzer, 1799)	I. Sivec	I. Sivec	2009-06-18	Croatia	Čabar, Mandli, Čabranka River	45.555	14.69
CROPL178-21	OK316295	BOLD:AAL2357	CNHM/CPSH215	28	Perlidae	Perla marginata (Panzer, 1799)	A. Delić, G. Čeple, M. Kučinić	I. Sivec	2018-05-10	Croatia	Knin, HE Miljacka, Krka River	44.002	16.019
CROPL202-21	OK316288	BOLD:AAL2357	CNHM/CPSH236	28	Perlidae	Perla marginata (Panzer, 1799)	I. Sivec	I. Sivec	2011-05-25	Slovenia	Šoštanj, Velunja	46.385	15.023
CROPL203-21	OK316282	BOLD:AAL2357	CNHM/CPSH237	28	Perlidae	Perla marginata (Panzer, 1799)	I. Sivec	I. Sivec	2011-05-24	Slovenia	Tolmin, Bača River	46.148	13.769
CROPL218-21	OK316361	BOLD:AAL2357	CNHM/CPSH252	28	Perlidae	Perla marginata (Panzer, 1799)	M. Kučinić, I. Vučković	I. Sivec	2021-06-21	Croatia	Konavle, Ljuta River, spring	42.538	18.379
CROPL219-21	OK316377	BOLD:AAL2357	CNHM/CPSH253	28	Perlidae	Perla marginata (Panzer, 1799)	M. Kučinić, I. Vučković	I. Sivec	2021-06-21	Croatia	Konavle, Ljuta River, spring	42.538	18.379
CROPL220-21	OK316272	BOLD:AAL2357	CNHM/CPSH254	28	Perlidae	Perla marginata (Panzer, 1799)	M. Kučinić, I. Vučković	I. Sivec	2021-06-21	Croatia	Konavle, Ljuta River, spring	42.538	18.379
CROPL221-21	OK316434	BOLD:AAL2357	CNHM/CPSH255	28	Perlidae	Perla marginata (Panzer, 1799)	M. Kučinić, I. Vučković	I. Sivec	2021-06-21	Croatia	Konavle, Ljuta River, spring	42.538	18.379
CROPL222-21	OK316202	BOLD:AAL2357	CNHM/CPSH256	28	Perlidae	Perla marginata (Panzer, 1799)	M. Kučinić, I. Vučković	I. Sivec	2021-06-21	Croatia	Konavle, Ljuta River, spring	42.538	18.379
CROPL223-21	OK316446	BOLD:AAL2357	CNHM/CPSH257	28	Perlidae	Perla marginata (Panzer, 1799)	M. Kučinić, I. Vučković	I. Sivec	2021-06-21	Croatia	Konavle, Ljuta River, spring	42.538	18.379
CROPL224-21	OK316194	BOLD:AAL2357	CNHM/CPSH258	28	Perlidae	Perla marginata (Panzer, 1799)	M. Kučinić, I. Vučković	I. Sivec	2021-06-21	Croatia	Konavle, Ljuta River, spring	42.538	18.379
CROPL275-21	OK316297	BOLD:AAL2357	CNHM/CPSH297	28	Perlidae	Perla marginata (Panzer, 1799)	D. Hlebec	I. Sivec	2021-02-26	Croatia	Kusonje, Papuk	45.457	17.226
CROPL287-21	OK316283	BOLD:AAL2357	CNHM/CPSH309	28	Perlidae	Perla marginata (Panzer, 1799)	D. Hlebec	I. Sivec	2021-03-09	Croatia	Kusonje, Papuk	45.457	17.226
CROPL339-21	OK316312	BOLD:AAL2357	CNHM/CPSH359	28	Perlidae	Perla marginata (Panzer, 1799)	D. Hlebec	I. Sivec	2021-06-01	Croatia	Butižnica	44.231	16.217
CROPL340-21	OK316329	BOLD:AAL2357	CNHM/CPSH360	28	Perlidae	Perla marginata (Panzer, 1799)	I. Sivec	I. Sivec	2021-05-30	Croatia	Čikotina lađa, Cetina River	43.533	16.745
CROPL119-21	OK316233	BOLD:AAL2357	CNHM/CPSH156	29	Perlidae	Perla sp.	I. Sivec	I. Sivec	2019-06-22	Croatia	Ruda, spring	43.674	16.793
CROPL245-21	OK316232	BOLD:AAL2357	CNHM/CPSH270	29	Perlidae	Perla sp.	A. Popijač	I. Sivec	2007-06-06	Croatia	Ruda, spring	43.674	16.793
CROPL037-21	OK316454	BOLD:AEH8224	CNHM/CPSH79	30	Perlodidae	Besdolus imhoffi (Pictet, 1841)	I. Sivec	I. Sivec	2005-07-21	Croatia	Čikotina lađa, Cetina River	43.533	16.745
CROPL056-21	OK316268	BOLD:AEH8224	CNHM/CPSH97	30	Perlodidae	Besdolus imhoffi (Pictet, 1841)	I. Sivec	I. Sivec	2005-06-21	Croatia	Čikotina lađa, Cetina River	43.533	16.745
CROPL193-21	OK316190	BOLD:AEH8224	CNHM/CPSH227	30	Perlodidae	Besdolus imhoffi (Pictet, 1841)	B. Horvat	I. Sivec	2005-06-21	Croatia	Čikotina lađa, Cetina River	43.533	16.745
CROPL341-21	OK316154	BOLD:AEH8224	CNHM/CPSH361	30	Perlodidae	Besdolus imhoffi (Pictet, 1841)	D. Hlebec	I. Sivec	2021-06-03	Croatia	Kuljani, Una River	45.167	16.476
CROPL358-21	OK316455	BOLD:AEH8224	CNHM/CPSH378	30	Perlodidae	Besdolus imhoffi (Pictet, 1841)	D. Hlebec	I. Sivec	2021-06-03	Croatia	Kuljani, Una River	45.167	16.476
CROPL187-21	OK316486	BOLD:AEH7640	CNHM/CPSH221	31	Perlodidae	Perlodes dispar (Rambur, 1842)	I. Sivec, D. Hlebec	I. Sivec	2020-03-14	Croatia	Mikleuš, Voćinska River	45.619	17.843
CROPL189-21	OK316158	BOLD:AEH7640	CNHM/CPSH223	31	Perlodidae	Perlodes dispar (Rambur, 1842)	D. Hlebec	I. Sivec	2020-03-13	Croatia	Čačinci, Vojlovica River	45.6	17.881
CROPL088-21	OK316292	BOLD:AAY9003	CNHM/CPSH128	32	Perlodidae	Perlodes intricatus (Pictet, 1841)	I. Sivec	I. Sivec	2005-06-02	Croatia	Plitvice Lakes, Crna rijeka	44.836	15.608
CROPL113-21	OK316349	BOLD:AAY9003	CNHM/CPSH152	32	Perlodidae	Perlodes intricatus (Pictet, 1841)	I. Sivec	I. Sivec	2021-06-20	Croatia	Plitvice Lakes, Bijela rijeka spring	44.839	15.578
CROPL009-21	OK316332	BOLD:AAL2343	CNHM/CPSH51	33	Perlodidae	Perlodes microcephalus (Pictet, 1833)	I. Sivec	I. Sivec	2010-05-20	Croatia	Zamost, Čabranka River	45.53	14.687
CROPL044-21	OK316390	BOLD:AAL2343	CNHM/CPSH86	33	Perlodidae	Perlodes microcephalus (Pictet, 1833)	I. Sivec	I. Sivec	2010-05-20	Croatia	Zamost, Čabranka River	45.53	14.687
CROPL145-21	OK316337	BOLD:AEH5507	CNHM/CPSH182	33	Perlodidae	Perlodes microcephalus (Pictet, 1833)	I. Sivec	I. Sivec	2021-04-14	Croatia	Mioči, Orljava River	45.447	17.471
CROPL285-21	OK316440	BOLD:AEH5507	CNHM/CPSH307	33	Perlodidae	Perlodes microcephalus (Pictet, 1833)	D. Hlebec	I. Sivec	2021-03-09	Croatia	Kusonje, Papuk	45.457	17.226
CROPL290-21	OK316313	BOLD:AEH5507	CNHM/CPSH312	33	Perlodidae	Perlodes microcephalus (Pictet, 1833)	D. Hlebec	I. Sivec	2021-03-09	Croatia	Kusonje, Papuk	45.457	17.226
CROPL036-21	OK316320	BOLD:ACS6073	CNHM/CPSH78	34	Perlodidae	Isoperla inermis Kaćanski & Zwick, 1970	I. Sivec	I. Sivec	2005-07-22	Croatia	Cetina River, spring	43.977	16.429
CROPL042-21	OK316343	BOLD:AEH8653	CNHM/CPSH84	34	Perlodidae	Isoperla inermis Kaćanski & Zwick, 1970	I. Sivec	I. Sivec	2005-06-22	Croatia	Cetina River, spring	43.977	16.429
CROPL111-21	OK316287	BOLD:AEH8653	CNHM/CPSH150	34	Perlodidae	Isoperla inermis Kaćanski & Zwick, 1970	I. Sivec	I. Sivec	2019-06-22	Croatia	Cetina River, Glavaš spring	43.977	16.429
CROPL112-21	OK316238	BOLD:AAZ7905	CNHM/CPSH151	34	Perlodidae	Isoperla inermis Kaćanski & Zwick, 1970	I. Sivec	I. Sivec	2019-06-20	Croatia	Plitvice Lakes, Bijela rijeka spring	44.839	15.578
CROPL124-21	OK316394	BOLD:ACS6073	CNHM/CPSH161	34	Perlodidae	Isoperla inermis Kaćanski & Zwick, 1970	I. Sivec	I. Sivec	2019-06-20	Croatia	Plitvice Lakes, Drakulić rijeka, spring	44.781	15.658
CROPL212-21	OK316248	BOLD:ACS6073	CNHM/CPSH246	34	Perlodidae	Isoperla inermis Kaćanski & Zwick, 1970	M. Kučinić, I. Vučković	I. Sivec	2020-06-23	Croatia	Plitvice Lakes, Drakulić rijeka, spring	44.781	15.658
CROPL216-21	OK316461	BOLD:ACS6073	CNHM/CPSH250	34	Perlodidae	Isoperla inermis Kaćanski & Zwick, 1970	M. Kučinić, I. Vučković	I. Sivec	2020-06-23	Croatia	Plitvice Lakes, Drakulić rijeka, spring	44.781	15.658
CROPL228-21	OK316260	BOLD:ACS6073	CNHM/CPSH262	34	Perlodidae	Isoperla inermis Kaćanski & Zwick, 1970	M. Kučinić, I. Vučković	I. Sivec	2020-06-07	Croatia	Plitvice Lakes, Drakulić rijeka, spring	44.781	15.658
CROPL260-21	OK316220	BOLD:AAZ7905	CNHM/CPSH282	34	Perlodidae	Isoperla inermis Kaćanski & Zwick, 1970	D. Hlebec	I. Sivec	2021-02-27	Croatia	Donja Suvaja, Una River	44.403	16.109
CROPL261-21	OK316187	BOLD:AAZ7905	CNHM/CPSH283	34	Perlodidae	Isoperla inermis Kaćanski & Zwick, 1970	D. Hlebec	I. Sivec	2021-02-27	Croatia	Donja Suvaja, Una River	44.403	16.109
CROPL302-21	OK316234	BOLD:AEH8653	CNHM/CPSH323	34	Perlodidae	Isoperla inermis Kaćanski & Zwick, 1970	I. Sivec	I. Sivec	2005-06-22	Croatia	Cetina River, Preočani spring	43.968	16.431
CROPL303-21	OK316204	BOLD:ACS6073	CNHM/CPSH324	34	Perlodidae	Isoperla inermis Kaćanski & Zwick, 1970	I. Sivec	I. Sivec	2019-06-20	Croatia	Plitvice Lakes, Crna rijeka spring	44.836	15.606
CROPL304-21	OK316392	BOLD:AEH8653	CNHM/CPSH325	34	Perlodidae	Isoperla inermis Kaćanski & Zwick, 1970	I. Sivec	I. Sivec	2007-06-06	Croatia	Ruda, spring	43.674	16.793
CROPL333-21	OK316449	BOLD:ACS6073	CNHM/CPSH353	34	Perlodidae	Isoperla inermis Kaćanski & Zwick, 1970	D. Hlebec	I. Sivec	2021-05-29	Croatia	Plitvice Lakes, Drakulić rijeka, spring	44.781	15.658
CROPL334-21	OK316243	BOLD:ACS6073	CNHM/CPSH354	34	Perlodidae	Isoperla inermis Kaćanski & Zwick, 1970	I. Sivec, D. Hlebec	I. Sivec	2021-05-31	Croatia	Cetina River, Preočani spring	43.968	16.431
CROPL343-21	OK316331	BOLD:AEH8653	CNHM/CPSH363	34	Perlodidae	Isoperla inermis Kaćanski & Zwick, 1970	I. Sivec, D. Hlebec	I. Sivec	2021-05-30	Croatia	Ruda, spring	43.674	16.793
CROPL346-21	OK316458	BOLD:AEH8653	CNHM/CPSH366	34	Perlodidae	Isoperla inermis Kaćanski & Zwick, 1970	D. Hlebec	I. Sivec	2021-05-31	Croatia	Cetina River, Preočani spring	43.968	16.431
CROPL351-21	OK316373	BOLD:ACS6073	CNHM/CPSH371	34	Perlodidae	Isoperla inermis Kaćanski & Zwick, 1970	D. Hlebec	I. Sivec	2021-05-29	Croatia	Plaški, Dretulja River	45.085	15.367
CROPL353-21	OK316226	BOLD:AEH8653	CNHM/CPSH373	34	Perlodidae	Isoperla inermis Kaćanski & Zwick, 1970	D. Hlebec	I. Sivec	2021-05-31	Croatia	Rumin	43.774	16.638
CROPL357-21	OK316447	BOLD:ACS6073	CNHM/CPSH377	34	Perlodidae	Isoperla inermis Kaćanski & Zwick, 1970	I. Sivec	I. Sivec	2021-05-28	Slovenia	Semič, Krupa River	45.632	15.227
CROPL359-21	OK316311	BOLD:ACS6073	CNHM/CPSH379	34	Perlodidae	Isoperla inermis Kaćanski & Zwick, 1970	D. Hlebec	I. Sivec	2021-05-30	Croatia	Plitvice Lakes, Drakulić rijeka, spring	44.781	15.658
CROPL360-21	OK316174	BOLD:AEH8653	CNHM/CPSH380	34	Perlodidae	Isoperla inermis Kaćanski & Zwick, 1970	I. Grbac, M. Kučinić	I. Sivec	2021-06-14	Croatia	Cetina River, Preočani spring	43.968	16.431
CROPL362-21	OK316325	BOLD:AEH8653	CNHM/CPSH382	34	Perlodidae	Isoperla inermis Kaćanski & Zwick, 1970	I. Grbac, M. Kučinić	I. Sivec	2021-06-14	Croatia	Cetina River, Preočani spring	43.968	16.431
CROPL366-21	OK316230	BOLD:AEH8653	CNHM/CPSH386	34	Perlodidae	Isoperla inermis Kaćanski & Zwick, 1970	I. Grbac, M. Kučinić	I. Sivec	2021-06-13	Croatia	Grab, spring	43.64	16.77
CROPL115-21	MW907982	BOLD:AEH7210	CNHM/CPSH1	35	Perlodidae	Isoperla popijaci Hlebec & Sivec, 2021	I. Sivec	I. Sivec	2019-06-21	Croatia	Ševerova Cave	44.68	15.631
CROPL116-21	MW907977	BOLD:AEH7210	CNHM/CPSH2	35	Perlodidae	Isoperla popijaci Hlebec & Sivec, 2021	I. Sivec	I. Sivec	2019-06-21	Croatia	Ševerova Cave	44.68	15.631
CROPL198-21	OK316444	BOLD:AEH7210	CNHM/CPSH232	35	Perlodidae	Isoperla popijaci Hlebec & Sivec, 2021	I. Sivec	I. Sivec	2021-06-02	Croatia	Mirići, Krbavica River	44.705	15.636
CROPL232-21	OK316428	BOLD:AEH7210	CNHM/CPSH3	35	Perlodidae	Isoperla popijaci Hlebec & Sivec, 2021	M. Kučinić	I. Sivec	2019-06-21	Croatia	Ševerova cave	44.68	15.631
CROPL249-21	MW907979	BOLD:AEH7210	CNHM/CPSH4	35	Perlodidae	Isoperla popijaci Hlebec & Sivec, 2021	D. Hlebec	I. Sivec	2021-02-22	Croatia	Ševerova cave	44.67	15.63
CROPL252-21	OK316443	BOLD:AEH7210	CNHM/CPSH5	35	Perlodidae	Isoperla popijaci Hlebec & Sivec, 2021	D. Hlebec	I. Sivec	2021-02-22	Croatia	Ševerova cave	44.68	15.631
CROPL305-21	OK316368	BOLD:AEH7210	CNHM/CPSH326	35	Perlodidae	Isoperla popijaci Hlebec & Sivec, 2021	I. Sivec	I. Sivec	2021-06-02	Croatia	Mirići, Krbavica River	44.705	15.636
CROPL356-21	OK316165	BOLD:AEH7210	CNHM/CPSH376	35	Perlodidae	Isoperla popijaci Hlebec & Sivec, 2021	D. Hlebec	I. Sivec	2021-06-02	Croatia	Mirići, Krbavica River	44.705	15.636
CROPL066-21	MW907993	BOLD:ACJ0709	CNHM/CPSH106	36	Perlodidae	Isoperla rivulorum (Pictet, 1841)	I. Sivec	I. Sivec	2004-07-20	Croatia	Kupa River, spring	45.49	14.69
CROPL180-21	OK316207	BOLD:ACJ0709	CNHM/CPSH217	36	Perlodidae	Isoperla rivulorum (Pictet, 1841)	I. Sivec	I. Sivec	2010-07-01	Slovenia	Koprivna, Črna na Koroškem	46.461	14.854
CROPL306-21	OK316276	BOLD:ACJ0709	CNHM/CPSH327	36	Perlodidae	Isoperla rivulorum (Pictet, 1841)	F. Perović	I. Sivec	2004-07-20	Croatia	Kupa River, spring	45.49	14.69
CROPL314-21	OK316424	BOLD:ACJ0709	CNHM/CPSH335	36	Perlodidae	Isoperla rivulorum (Pictet, 1841)	D. Hlebec	I. Sivec	2021-05-10	Slovenia	Matkov Kot	46.409	14.616
CROPL127-21	MW907990	BOLD:AEH7211	CNHM/CPSH164	37	Perlodidae	Isoperla cf. lugens	I. Sivec	I. Sivec	2021-06-20	Croatia	Plitvice Lakes, Drakulić rijeka, spring	44.781	15.658
CROPL128-21	MW907980	BOLD:AEH7211	CNHM/CPSH165	37	Perlodidae	Isoperla cf. lugens	I. Sivec	I. Sivec	2021-06-20	Croatia	Plitvice Lakes, Drakulić rijeka, spring	44.781	15.658
CROPL214-21	MW907984	BOLD:AEH7211	CNHM/CPSH248	37	Perlodidae	Isoperla cf. lugens	M. Kučinić, I. Vučković	I. Sivec	2020-06-23	Croatia	Plitvice Lakes, Drakulić rijeka, spring	44.781	15.658
CROPL217-21	MW907986	BOLD:AEH7211	CNHM/CPSH251	37	Perlodidae	Isoperla cf. lugens	M. Kučinić, I. Vučković	I. Sivec	2020-06-23	Croatia	Plitvice Lakes, Drakulić rijeka, spring	44.781	15.658
CROPL230-21	MW907988	BOLD:AEH7211	CNHM/CPSH264	37	Perlodidae	Isoperla cf. lugens	M. Kučinić, I. Vučković	I. Sivec	2020-06-07	Croatia	Plitvice Lakes, Drakulić rijeka, spring	44.781	15.658
CROPL307-21	OK316258	BOLD:AEH7211	CNHM/CPSH328	37	Perlodidae	Isoperla cf. lugens	I. Sivec	I. Sivec	2014-06-12	Croatia	Bistrac Tounjski, Bistrice Stream	45.281	15.297
CROPL308-21	OK316411	BOLD:AEH7211	CNHM/CPSH329	37	Perlodidae	Isoperla cf. lugens	I. Sivec	I. Sivec	2019-06-20	Croatia	Plitvice Lakes, Crna rijeka spring	44.836	15.606
CROPL309-21	OK316372	BOLD:AEH7211	CNHM/CPSH330	37	Perlodidae	Isoperla cf. lugens	I. Sivec	I. Sivec	2009-07-23	Croatia	Čabranka River	45.602	14.641
CROPL310-21	OK316405	BOLD:AEH7211	CNHM/CPSH331	37	Perlodidae	Isoperla cf. lugens	I. Sivec	I. Sivec	2014-04-19	Croatia	Plaški, Dretulja River	45.085	15.367
CROPL311-21	OK316463	BOLD:AEH7211	CNHM/CPSH332	37	Perlodidae	Isoperla cf. lugens	I. Sivec	I. Sivec	2009-07-23	Croatia	Kupa River, spring	45.49	14.69
CROPL312-21	OK316427	BOLD:AEH7211	CNHM/CPSH333	37	Perlodidae	Isoperla cf. lugens	I. Sivec	I. Sivec	2014-06-12	Croatia	Vitunjčica, spring	45.291	15.141
CROPL332-21	OK316285	BOLD:AEH7211	CNHM/CPSH352	37	Perlodidae	Isoperla cf. lugens	I. Sivec	I. Sivec	2021-06-03	Croatia	Slunjčica	45.081	15.592
CROPL335-21	OK316281	BOLD:AEH7211	CNHM/CPSH355	37	Perlodidae	Isoperla cf. lugens	I. Sivec	I. Sivec	2021-05-28	Slovenia	Podturn, Podturn spring	45.746	15.042
CROPL344-21	OK316252	BOLD:AEH7211	CNHM/CPSH364	37	Perlodidae	Isoperla cf. lugens	D. Hlebec	I. Sivec	2021-05-29	Croatia	Plitvice Lakes, Drakulić rijeka, spring	44.781	15.658
CROPL349-21	OK316407	BOLD:AEH7211	CNHM/CPSH369	37	Perlodidae	Isoperla cf. lugens	D. Hlebec	I. Sivec	2021-05-29	Croatia	Plaški, Dretulja River	45.085	15.367
CROPL352-21	OK316177	BOLD:AEH7211	CNHM/CPSH372	37	Perlodidae	Isoperla cf. lugens	D. Hlebec	I. Sivec	2021-05-29	Croatia	Vitunjčica, spring	45.291	15.141
CROPL354-21	OK316362	BOLD:AEH7211	CNHM/CPSH374	37	Perlodidae	Isoperla cf. lugens	I. Sivec	I. Sivec	2021-05-28	Slovenia	Poltarica spring, Gradiček	45.887	14.774
CROPL368-21	OK316293	BOLD:ACL6568	CNHM/CPSH388	38	Perlodidae	Isoperla goertzi Illies, 1952	L. Klatarić	I. Sivec	2021-06-25	Croatia	Ivanščica, Šumi Stream	46.189	16.157
CROPL370-21	OK316224	BOLD:ACL6568	CNHM/CPSH390	38	Perlodidae	Isoperla goertzi Illies, 1952	L. Klatarić	I. Sivec	2021-06-25	Croatia	Ivanščica, Šumi Stream	46.189	16.157
CROPL031-21	OK316309	BOLD:AEH3374	CNHM/CPSH73	39	Perlodidae	Isoperla bosnica Aubert, 1964	I. Sivec	I. Sivec	2011-05-02	Croatia	Čabranka River	45.602	14.641
CROPL045-21	OK316241	BOLD:AEH3374	CNHM/CPSH87	39	Perlodidae	Isoperla bosnica Aubert, 1964	I. Sivec	I. Sivec	2011-05-01	Croatia	Čabranka River	45.602	14.641
CROPL068-21	MW907989	BOLD:AEH3374	CNHM/CPSH108	39	Perlodidae	Isoperla bosnica Aubert, 1964	I. Sivec	I. Sivec	2004-07-21	Croatia	Sedalce, Kupa River	45.508	14.783
CROPL073-21	MW907981	BOLD:AEH3374	CNHM/CPSH113	39	Perlodidae	Isoperla bosnica Aubert, 1964	I. Sivec	I. Sivec	2004-07-21	Croatia	Sedalce, Kupa River	45.508	14.783
CROPL196-21	OK316180	BOLD:AEH3374	CNHM/CPSH230	39	Perlodidae	Isoperla bosnica Aubert, 1964	I. Sivec	I. Sivec	2011-05-02	Croatia	Hrvatsko, Kupa River	45.534	14.708
CROPL154-21	OK316335	BOLD:AEH6396	CNHM/CPSH191	40	Perlodidae	Isoperla grammatica (Poda, 1761)	I. Sivec	I. Sivec	2019-04-14	Croatia	Pakrac, Pakra River	45.457	17.226
CROPL205-21	OK316308	BOLD:AEH6396	CNHM/CPSH239	40	Perlodidae	Isoperla grammatica (Poda, 1761)	D. Hlebec	I. Sivec	2020-05-03	Croatia	Žabnik, Mura River	46.532	16.375
CROPL229-21	OK316342	BOLD:AEH6396	CNHM/CPSH263	40	Perlodidae	Isoperla grammatica (Poda, 1761)	D. Hlebec	I. Sivec	2020-04-25	Croatia	Novakovec, Mura River	46.469	16.585
CROPL231-21	OK316484	BOLD:AEH6396	CNHM/CPSH265	40	Perlodidae	Isoperla grammatica (Poda, 1761)	D. Hlebec	I. Sivec	2020-04-25	Croatia	Podturen, Mura River	46.471	16.556
CROPL265-21	OK316351	BOLD:AEH6396	CNHM/CPSH287	40	Perlodidae	Isoperla grammatica (Poda, 1761)	D. Hlebec	I. Sivec	2021-02-26	Croatia	Kusonje, Papuk	45.457	17.226
CROPL276-21	OK316181	BOLD:AEH6396	CNHM/CPSH298	40	Perlodidae	Isoperla grammatica (Poda, 1761)	D. Hlebec	I. Sivec	2021-02-26	Croatia	Kusonje, Papuk	45.457	17.226
CROPL292-21	OK316375	BOLD:AEH6396	CNHM/CPSH314	40	Perlodidae	Isoperla grammatica (Poda, 1761)	D. Hlebec	I. Sivec	2021-03-09	Croatia	Kusonje, Papuk	45.457	17.226
CROPL318-21	OK316412	BOLD:AEG4373	CNHM/CPSH339	40	Perlodidae	Isoperla grammatica (Poda, 1761)	I. Sivec	I. Sivec	2021-05-09	Slovenia	Štangarske poljane, Reka Stream	46.031	14.776
CROPL338-21	OK316433	BOLD:AEH6396	CNHM/CPSH358	40	Perlodidae	Isoperla grammatica (Poda, 1761)	I. Sivec	I. Sivec	2021-06-03	Croatia	Kusonje, Papuk	45.458	17.226
CROPL342-21	OK316364	BOLD:AEH6396	CNHM/CPSH362	40	Perlodidae	Isoperla grammatica (Poda, 1761)	D. Hlebec	I. Sivec	2021-06-03	Croatia	Papuk, Slatinski Drenovac, Šumetlica	45.567	17.732
CROPL315-21	OK316278	BOLD:AEK7440	CNHM/CPSH336	41	Perlodidae	Isoperla albanica Aubert, 1964	D. Hlebec	I. Sivec	2021-05-10	Slovenia	Spodnji Dolič	46.405	15.264
CROPL317-21	OK316184	BOLD:AEK7440	CNHM/CPSH338	41	Perlodidae	Isoperla albanica Aubert, 1964	D. Hlebec	I. Sivec	2021-05-09	Slovenia	Mala Reka	46.033	14.756
CROPL097-21	MW907992	BOLD:AEH3875	CNHM/CPSH136	42	Perlodidae	Isoperla illyrica Tabacaru, 1971	I. Sivec	I. Sivec	2005-06-01	Croatia	Grab, spring	43.64	16.77
CROPL123-21	OK316451	BOLD:AEH7030	CNHM/CPSH160	42	Perlodidae	Isoperla illyrica Tabacaru, 1971	I. Sivec	I. Sivec	2019-06-22	Croatia	Ruda, spring	43.674	16.793
CROPL197-21	MW907983	BOLD:AEH3875	CNHM/CPSH231	42	Perlodidae	Isoperla illyrica Tabacaru, 1971	I. Sivec	I. Sivec	2006-06-01	Croatia	Grab, spring	43.64	16.77
CROPL329-21	OK316304	BOLD:AEH7030	CNHM/CPSH350	42	Perlodidae	Isoperla illyrica Tabacaru, 1971	D. Hlebec	I. Sivec	2021-05-31	Croatia	Roški slap, Krka River	43.903	15.976
CROPL364-21	OK316306	BOLD:AEH3875	CNHM/CPSH384	42	Perlodidae	Isoperla illyrica Tabacaru, 1971	I. Grbac, M. Kučinić	I. Sivec	2021-06-13	Croatia	Grab, spring	43.64	16.77
CROPL365-21	OK316432	BOLD:AEH7030	CNHM/CPSH385	42	Perlodidae	Isoperla illyrica Tabacaru, 1971	I. Grbac, M. Kučinić	I. Sivec	2021-06-13	Croatia	Grab, spring	43.64	16.77
CROPL109-21	MW907987	BOLD:AEH3875	CNHM/CPSH148	43	Perlodidae	Isoperla tripartita Illies, 1954	I. Sivec	I. Sivec	2019-06-22	Croatia	Cetina River, Preočani spring	43.968	16.431
CROPL110-21	OK316231	BOLD:AEH3875	CNHM/CPSH149	43	Perlodidae	Isoperla tripartita Illies, 1954	I. Sivec	I. Sivec	2019-06-22	Croatia	Cetina River, Preočani spring	43.968	16.431
CROPL122-21	MW907978	BOLD:AEH7030	CNHM/CPSH159	43	Perlodidae	Isoperla tripartita Illies, 1954	I. Sivec	I. Sivec	2019-06-22	Croatia	Grab, spring	43.64	16.77
CROPL195-21	MW907991	BOLD:AEH3875	CNHM/CPSH229	43	Perlodidae	Isoperla tripartita Illies, 1954	B. Horvat	I. Sivec	2005-06-22	Croatia	Cetina River, Glavaš spring	43.977	16.429
CROPL225-21	MW907985	BOLD:AEH3876	CNHM/CPSH259	43	Perlodidae	Isoperla tripartita Illies, 1954	I. Vučković	I. Sivec	2020-07-02	Croatia	Papuk, Gospin potok	45.519	17.686
CROPL300-21	OK316402	BOLD:AEH3875	CNHM/CPSH321	43	Perlodidae	Isoperla tripartita Illies, 1954	I. Sivec	I. Sivec	2007-07-06	Croatia	Cetina River, Preočani spring	43.968	16.431
CROPL301-21	OK316426	BOLD:AEH3876	CNHM/CPSH322	43	Perlodidae	Isoperla tripartita Illies, 1954	I. Sivec	I. Sivec	2014-06-06	Croatia	Bilogora, Ribnjačka, Žirovnjak Stream	45.887	17.087
CROPL336-21	OK316211	BOLD:AEH3875	CNHM/CPSH356	43	Perlodidae	Isoperla tripartita Illies, 1954	I. Sivec	I. Sivec	2021-05-31	Croatia	Cetina River, Preočani spring	43.968	16.431
CROPL348-21	OK316336	BOLD:AEH3875	CNHM/CPSH368	43	Perlodidae	Isoperla tripartita Illies, 1954	D. Hlebec	I. Sivec	2021-05-31	Croatia	Cetina River, Preočani spring	43.968	16.431
CROPL361-21	OK316413	BOLD:AEH3875	CNHM/CPSH381	43	Perlodidae	Isoperla tripartita Illies, 1954	I. Grbac, M. Kučinić	I. Sivec	2021-06-14	Croatia	Cetina River, Preočani spring	43.968	16.431
CROPL363-21	OK316423	BOLD:AEG6510	CNHM/CPSH383	43	Perlodidae	Isoperla tripartita Illies, 1954	I. Grbac, M. Kučinić	I. Sivec	2021-06-13	Croatia	Grab, spring	43.64	16.77
CROPL181-21	OK316256	BOLD:AAM9905	CNHM/CPSH218	44	Taeniopterygidae	Taeniopteryx nebulosa (Linnaeus, 1758)	I. Sivec	I. Sivec	2010-02-25	Croatia	Mrzljaki, Kupa River	45.532	15.314
CROPL250-21	OK316208	BOLD:AAM9905	CNHM/CPSH273	44	Taeniopterygidae	Taeniopteryx nebulosa (Linnaeus, 1758)	D. Hlebec	I. Sivec	2021-02-22	Croatia	Cerovac Vukmanićki, Korana River	45.427	15.609
CROPL253-21	OK316393	BOLD:AAM9905	CNHM/CPSH275	44	Taeniopterygidae	Taeniopteryx nebulosa (Linnaeus, 1758)	D. Hlebec	I. Sivec	2021-02-22	Croatia	Rastoke	45.12	15.588
CROPL266-21	OK316359	BOLD:AAM9905	CNHM/CPSH288	44	Taeniopterygidae	Taeniopteryx nebulosa (Linnaeus, 1758)	D. Hlebec	I. Sivec	2021-02-26	Croatia	Čačinci, Vojlovica River	45.6	17.881
CROPL267-21	OK316379	BOLD:AAM9905	CNHM/CPSH289	44	Taeniopterygidae	Taeniopteryx nebulosa (Linnaeus, 1758)	D. Hlebec	I. Sivec	2021-02-26	Croatia	Čačinci, Vojlovica River	45.6	17.881
CROPL269-21	OK316213	BOLD:AAM9905	CNHM/CPSH291	44	Taeniopterygidae	Taeniopteryx nebulosa (Linnaeus, 1758)	D. Hlebec	I. Sivec	2021-02-26	Croatia	Čačinci, Vojlovica River	45.6	17.881
CROPL184-21	OK316471	BOLD:AAM9906	CNHM/CPSH219	45	Taeniopterygidae	Taeniopteryx schoenemundi (Mertens, 1923)	I. Sivec	I. Sivec	2010-03-14	Croatia	Blaževci, Kupa River	45.488	15.067
CROPL270-21	OK316389	BOLD:AAM9906	CNHM/CPSH292	45	Taeniopterygidae	Taeniopteryx schoenemundi (Mertens, 1923)	D. Hlebec	I. Sivec	2021-02-26	Croatia	Kusonje, Papuk	45.457	17.226
CROPL280-21	OK316221	BOLD:AAM9906	CNHM/CPSH302	45	Taeniopterygidae	Taeniopteryx schoenemundi (Mertens, 1923)	D. Hlebec	I. Sivec	2021-03-10	Croatia	Kusonje, Papuk	45.457	17.226
CROPL289-21	OK316363	BOLD:AAM9906	CNHM/CPSH311	45	Taeniopterygidae	Taeniopteryx schoenemundi (Mertens, 1923)	D. Hlebec	I. Sivec	2021-03-09	Croatia	Kusonje, Papuk	45.457	17.226
CROPL316-21	OK316254	BOLD:ACB1944	CNHM/CPSH337	46	Taeniopterygidae	Taeniopteryx hubaulti Aubert, 1946	I. Sivec	I. Sivec	2008-02-19	Slovenia	Muta, Mučka Bistrica	46.61	15.156
CROPL005-21	OK316437	BOLD:AEH4420	CNHM/CPSH47	47	Taeniopterygidae	Taeniopteryx n.sp. CRO-1	I. Sivec	I. Sivec	2019-02-28	Croatia	Hrvatsko, Kupa River	45.534	14.708
CROPL006-21	OK316294	BOLD:AEH4420	CNHM/CPSH48	47	Taeniopterygidae	Taeniopteryx n.sp. CRO-1	I. Sivec	I. Sivec	2019-02-28	Croatia	Čabranka River	45.602	14.641
CROPL012-21	OK316399	BOLD:AEH4420	CNHM/CPSH54	47	Taeniopterygidae	Taeniopteryx n.sp. CRO-1	I. Sivec	I. Sivec	2015-03-30	Croatia	Plaški, Dretulja River	45.085	15.367
CROPL028-21	OK316356	BOLD:AEH4420	CNHM/CPSH70	47	Taeniopterygidae	Taeniopteryx n.sp. CRO-1	I. Sivec	I. Sivec	2015-03-30	Croatia	Vitunjčica, spring	45.291	15.141
CROPL050-21	OK316456	BOLD:AEH4420	CNHM/CPSH92	47	Taeniopterygidae	Taeniopteryx n.sp. CRO-1	I. Sivec	I. Sivec	2015-03-31	Croatia	Una River, spring	44.399	16.108
CROPL053-21	OK316240	BOLD:AEH4420	CNHM/CPSH94	47	Taeniopterygidae	Taeniopteryx n.sp. CRO-1	I. Sivec	I. Sivec	2015-03-31	Croatia	Una River, spring	44.399	16.108
CROPL064-21	OK316408	BOLD:AEH4420	CNHM/CPSH104	47	Taeniopterygidae	Taeniopteryx n.sp. CRO-1	I. Sivec	I. Sivec	2015-03-30	Croatia	Vitunjčica, spring	45.291	15.141
CROPL078-21	OK316274	BOLD:AEH4420	CNHM/CPSH118	47	Taeniopterygidae	Taeniopteryx n.sp. CRO-1	I. Sivec	I. Sivec	2015-03-31	Croatia	Donja Suvaja, Una River	44.403	16.109
CROPL081-21	OK316212	BOLD:AEH4420	CNHM/CPSH121	47	Taeniopterygidae	Taeniopteryx n.sp. CRO-1	I. Sivec	I. Sivec	2015-03-31	Croatia	Donja Suvaja, Una River	44.403	16.109
CROPL106-21	OK316472	BOLD:AEH4420	CNHM/CPSH145	47	Taeniopterygidae	Taeniopteryx n.sp. CRO-1	I. Sivec	I. Sivec	2019-05-02	Croatia	Gerovčica, spring	45.528	14.677
CROPL251-21	OK316267	BOLD:AEH4420	CNHM/CPSH274	47	Taeniopterygidae	Taeniopteryx n.sp. CRO-1	D. Hlebec	I. Sivec	2021-02-22	Croatia	Plaški, Dretulja River	45.085	15.367
CROPL263-21	OK316483	BOLD:AEH4420	CNHM/CPSH285	47	Taeniopterygidae	Taeniopteryx n.sp. CRO-1	D. Hlebec	I. Sivec	2021-02-27	Croatia	Una River, spring	44.399	16.108
CROPL264-21	OK316214	BOLD:AEH4420	CNHM/CPSH286	47	Taeniopterygidae	Taeniopteryx n.sp. CRO-1	D. Hlebec	I. Sivec	2021-02-27	Croatia	Una River, spring	44.399	16.108
CROPL321-21	OK316253	BOLD:AEH4420	CNHM/CPSH342	47	Taeniopterygidae	Taeniopteryx n.sp. CRO-1	I. Sivec	I. Sivec	2019-03-16	Croatia	Plitvice Lakes, Crna rijeka spring	44.836	15.606
CROPL319-21	OK316199	BOLD:AAK2653	CNHM/CPSH340	48	Capniidae	Capnopsis schilleri balcanica Zwick, 1984	I. Sivec	I. Sivec	2021-04-15	Croatia	Papuk, Slatinski Drenovac, Šumetlica	45.567	17.732
CROPL188-21	OK316452	BOLD:ACK6645	CNHM/CPSH222	49	Taeniopterygidae	Rhabdiopteryx acuminata Klapálek, 1905	I. Sivec	I. Sivec	2020-03-14	Croatia	Čačinci, Vojlovica River	45.6	17.881
CROPL295-21	OK316159	BOLD:ACK6645	CNHM/CPSH317	49	Taeniopterygidae	Rhabdiopteryx acuminata Klapálek, 1905	D. Hlebec	I. Sivec	2021-03-07	Croatia	Čačinci, Vojlovica River	45.6	17.881
CROPL296-21	OK316330	BOLD:ACK6645	CNHM/CPSH318	49	Taeniopterygidae	Rhabdiopteryx acuminata Klapálek, 1905	D. Hlebec	I. Sivec	2021-03-07	Croatia	Voćin, Djedovica Stream	45.602	17.662
CROPL298-21	OK316170	BOLD:ACK6645	CNHM/CPSH320	49	Taeniopterygidae	Rhabdiopteryx acuminata Klapálek, 1905	D. Hlebec	I. Sivec	2021-03-09	Croatia	Voćin, Djedovica Stream	45.602	17.662
CROPL011-21	OK316415	BOLD:ACI0628	CNHM/CPSH53	50	Capniidae	Zwicknia rupprechti Murányi, Orci & Gamboa, 2014	I. Sivec	I. Sivec	2015-02-16	Croatia	Šemovci, Hotovica	46.033	16.948
CROPL018-21	OK316168	BOLD:ACI0628	CNHM/CPSH60	50	Capniidae	Zwicknia rupprechti Murányi, Orci & Gamboa, 2014	I. Sivec	I. Sivec	2015-02-16	Croatia	Šemovci, Hotovica	46.033	16.948
CROPL008-21	OK316193	BOLD:AAW8114	CNHM/CPSH50	51	Capniidae	Zwicknia bifrons (Newman, 1838)	I. Sivec	I. Sivec	2019-02-28	Croatia	Štefanci, Kupa River	45.492	15.057
CROPL017-21	OK316167	BOLD:AAW8114	CNHM/CPSH59	51	Capniidae	Zwicknia bifrons (Newman, 1838)	I. Sivec	I. Sivec	2015-04-07	Croatia	Jasenak Abyss	45.249	15.025
CROPL283-21	OK316270	BOLD:AAW8114	CNHM/CPSH305	51	Capniidae	Zwicknia bifrons (Newman, 1838)	D. Hlebec	I. Sivec	2021-03-07	Croatia	Voćin, Djedovica Stream	45.602	17.662
CROPL001-21	OK316435	BOLD:AAI8345	CNHM/CPSH43	52	Taeniopterygidae	Brachyptera risi (Morton, 1896)	I. Sivec	I. Sivec	2019-02-28	Croatia	Zavrh, Kupa River	45.523	14.944
CROPL007-21	OK316457	BOLD:AAI8345	CNHM/CPSH49	52	Taeniopterygidae	Brachyptera risi (Morton, 1896)	I. Sivec	I. Sivec	2019-02-28	Croatia	Čabranka River	45.602	14.641
CROPL013-21	OK316286	BOLD:AAI8345	CNHM/CPSH55	52	Taeniopterygidae	Brachyptera risi (Morton, 1896)	I. Sivec	I. Sivec	2015-04-07	Croatia	Jasenak Abyss	45.249	15.025
CROPL020-21	OK316284	BOLD:AAI8345	CNHM/CPSH62	52	Taeniopterygidae	Brachyptera risi (Morton, 1896)	I. Sivec	I. Sivec	2015-04-07	Croatia	Jasenak Abyss	45.249	15.025
CROPL060-21	OK316242	BOLD:AAI8345	CNHM/CPSH101	52	Taeniopterygidae	Brachyptera risi (Morton, 1896)	I. Sivec	I. Sivec	2015-03-23	Croatia	Zrinska gora, Čatlan	45.193	16.407
CROPL062-21	OK316448	BOLD:AAI8345	CNHM/CPSH102	52	Taeniopterygidae	Brachyptera risi (Morton, 1896)	I. Sivec	I. Sivec	2015-03-17	Croatia	Ivanščica, Dugi jarak	46.175	16.058
CROPL093-21	OK316480	BOLD:AAI8345	CNHM/CPSH132	52	Taeniopterygidae	Brachyptera risi (Morton, 1896)	I. Sivec	I. Sivec	2015-03-23	Croatia	Zrinska gora, Čatlan	45.193	16.407
CROPL099-21	OK316354	BOLD:AAI8345	CNHM/CPSH138	52	Taeniopterygidae	Brachyptera risi (Morton, 1896)	I. Sivec	I. Sivec	2015-03-17	Croatia	Ivanščica, Dugi jarak	46.175	16.058
CROPL151-21	OK316175	BOLD:AAI8345	CNHM/CPSH188	52	Taeniopterygidae	Brachyptera risi (Morton, 1896)	I. Sivec	I. Sivec	2019-04-14	Croatia	Mioči, Orljava River	45.447	17.471
CROPL152-21	OK316322	BOLD:AAI8345	CNHM/CPSH189	52	Taeniopterygidae	Brachyptera risi (Morton, 1896)	I. Sivec	I. Sivec	2019-04-14	Croatia	Mioči, Orljava River	45.447	17.471
CROPL259-21	OK316291	BOLD:AAI8345	CNHM/CPSH281	52	Taeniopterygidae	Brachyptera risi (Morton, 1896)	D. Hlebec	I. Sivec	2021-02-27	Croatia	Una River, Neteka	44.381	16.123
CROPL273-21	OK316459	BOLD:AAI8345	CNHM/CPSH295	52	Taeniopterygidae	Brachyptera risi (Morton, 1896)	D. Hlebec	I. Sivec	2021-02-26	Croatia	Mioči, Orljava River	45.447	17.471
CROPL277-21	OK316419	BOLD:AAI8345	CNHM/CPSH299	52	Taeniopterygidae	Brachyptera risi (Morton, 1896)	D. Hlebec	I. Sivec	2021-02-26	Croatia	Mioči, Orljava River	45.447	17.471
CROPL291-21	OK316163	BOLD:AAI8345	CNHM/CPSH313	52	Taeniopterygidae	Brachyptera risi (Morton, 1896)	I. Sivec	I. Sivec	2021-03-08	Croatia	Velika, Veličanka River	45.484	17.648
CROPL026-21	OK316430	BOLD:AEE2811	CNHM/CPSH68	53	Taeniopterygidae	Brachyptera tristis (Klapálek, 1901)	I. Sivec	I. Sivec	2015-04-10	Croatia	Plitvice Stream	44.902	15.574
CROPL102-21	OK316171	BOLD:AEE2811	CNHM/CPSH141	53	Taeniopterygidae	Brachyptera tristis (Klapálek, 1901)	I. Sivec	I. Sivec	2019-05-02	Croatia	Gerovčica, spring	45.528	14.677
CROPL104-21	OK316247	BOLD:AEE2811	CNHM/CPSH143	53	Taeniopterygidae	Brachyptera tristis (Klapálek, 1901)	I. Sivec	I. Sivec	2019-05-02	Croatia	Gerovčica, spring	45.528	14.677
CROPL254-21	OK316466	BOLD:AEE2811	CNHM/CPSH276	53	Taeniopterygidae	Brachyptera tristis (Klapálek, 1901)	D. Hlebec	I. Sivec	2021-02-22	Croatia	Plitvice Lakes, Drakulić rijeka, spring	44.781	15.658
CROPL255-21	OK316149	BOLD:AEE2811	CNHM/CPSH277	53	Taeniopterygidae	Brachyptera tristis (Klapálek, 1901)	D. Hlebec	I. Sivec	2021-02-22	Croatia	Plitvice Lakes, Drakulić rijeka, spring	44.781	15.658
CROPL256-21	OK316235	BOLD:AEE2811	CNHM/CPSH278	53	Taeniopterygidae	Brachyptera tristis (Klapálek, 1901)	D. Hlebec	I. Sivec	2021-02-22	Croatia	Plitvice Lakes, Drakulić rijeka, spring	44.781	15.658
CROPL262-21	OK316155	BOLD:AEE2811	CNHM/CPSH284	53	Taeniopterygidae	Brachyptera tristis (Klapálek, 1901)	D. Hlebec	I. Sivec	2021-02-27	Croatia	Donja Suvaja, Una River	44.403	16.109
CROPL322-21	OK316388	BOLD:AEE2811	CNHM/CPSH343	53	Taeniopterygidae	Brachyptera tristis (Klapálek, 1901)	I. Sivec	I. Sivec	2019-03-16	Croatia	Plitvice Lakes, Crna rijeka spring	44.836	15.606
CROPL014-21	OK316323	BOLD:AAY5851	CNHM/CPSH56	54	Taeniopterygidae	Brachyptera seticornis (Klapálek, 1902)	I. Sivec	I. Sivec	2015-02-28	Croatia	Medvednica, Bistra Stream	45.938	15.928
CROPL046-21	OK316438	BOLD:AAY5851	CNHM/CPSH88	54	Taeniopterygidae	Brachyptera seticornis (Klapálek, 1902)	I. Sivec	I. Sivec	2015-03-23	Croatia	Zrinska gora, Čatlan	45.193	16.407
CROPL049-21	OK316239	BOLD:AAY5851	CNHM/CPSH91	54	Taeniopterygidae	Brachyptera seticornis (Klapálek, 1902)	I. Sivec	I. Sivec	2015-03-23	Croatia	Zrinska gora, Čatlan	45.193	16.407
CROPL055-21	OK316453	BOLD:AAY5851	CNHM/CPSH96	54	Taeniopterygidae	Brachyptera seticornis (Klapálek, 1902)	I. Sivec	I. Sivec	2015-02-28	Croatia	Medvednica, Bistra Stream	45.938	15.928
CROPL139-21	OK316166	BOLD:AAY5851	CNHM/CPSH176	54	Taeniopterygidae	Brachyptera seticornis (Klapálek, 1902)	I. Sivec	I. Sivec	2019-04-13	Croatia	Vučjak Kamenski, Brzaja Stream	45.489	17.561
CROPL149-21	OK316237	BOLD:AAY5851	CNHM/CPSH186	54	Taeniopterygidae	Brachyptera seticornis (Klapálek, 1902)	I. Sivec	I. Sivec	2019-04-15	Croatia	Kaptol, Bistra Stream	45.462	17.727
CROPL058-21	OK316401	BOLD:AAN0872	CNHM/CPSH99	55	Taeniopterygidae	Brachyptera monilicornis (Pictet, 1841)	I. Sivec	I. Sivec	2009-02-26	Croatia	Mrzljaki, Kupa River	45.532	15.314
CROPL065-21	OK316229	BOLD:AAN0872	CNHM/CPSH105	55	Taeniopterygidae	Brachyptera monilicornis (Pictet, 1841)	I. Sivec	I. Sivec	2009-02-26	Croatia	Mrzljaki, Kupa River	45.532	15.314
CROPL272-21	OK316403	BOLD:AAN0872	CNHM/CPSH294	55	Taeniopterygidae	Brachyptera monilicornis (Pictet, 1841)	D. Hlebec	I. Sivec	2021-02-26	Croatia	Mioči, Orljava River	45.447	17.471
CROPL284-21	OK316227	BOLD:AAN0872	CNHM/CPSH306	55	Taeniopterygidae	Brachyptera monilicornis (Pictet, 1841)	I. Sivec	I. Sivec	2021-03-09	Croatia	Daruvar, manastir Pakra	45.554	17.336
CROPL293-21	OK316344	BOLD:AAN0872	CNHM/CPSH315	55	Taeniopterygidae	Brachyptera monilicornis (Pictet, 1841)	D. Hlebec	I. Sivec	2021-03-09	Croatia	Kusonje, Papuk	45.457	17.226
CROPL297-21	OK316215	BOLD:AAN0872	CNHM/CPSH319	55	Taeniopterygidae	Brachyptera monilicornis (Pictet, 1841)	D. Hlebec	I. Sivec	2021-03-09	Croatia	Daruvar, manastir Pakra	45.554	17.336
CROPL033-21	OK316315	BOLD:AAF0555	CNHM/CPSH75	56	Nemouridae	Nemurella picteti (Klapálek, 1900)	I. Sivec	I. Sivec	2015-04-09	Croatia	Krasulja, Krbavica River	44.677	15.632
CROPL035-21	OK316218	BOLD:AAF0555	CNHM/CPSH77	56	Nemouridae	Nemurella picteti (Klapálek, 1900)	I. Sivec	I. Sivec	2015-04-09	Croatia	Krasulja, Krbavica River	44.677	15.632
CROPL144-21	OK316271	BOLD:AAF0555	CNHM/CPSH181	56	Nemouridae	Nemurella picteti (Klapálek, 1900)	I. Sivec	I. Sivec	2019-04-14	Croatia	3 km NW Gornji Vrhovci	45.486	17.562
CROPL146-21	OK316216	BOLD:AAF0555	CNHM/CPSH183	56	Nemouridae	Nemurella picteti (Klapálek, 1900)	I. Sivec	I. Sivec	2019-04-14	Croatia	3 km NW Gornji Vrhovci	45.486	17.562
CROPL185-21	OK316414	BOLD:AAF0555	CNHM/CPSH220	56	Nemouridae	Nemurella picteti (Klapálek, 1900)	I. Sivec	I. Sivec	2019-10-26	Croatia	Plitvice Lakes, Bijela rijeka spring	44.839	15.578
CROPL240-21	OK316179	BOLD:AAF0555	CNHM/CPSH269	56	Nemouridae	Nemurella picteti (Klapálek, 1900)	I. Sivec	I. Sivec	2020-10-06	Croatia	Mazin, Lička Plješivica	44.39	15.894
CROPL117-21	OK316316	BOLD:AAY9658	CNHM/CPSH154	57	Nemouridae	Amphinemura standfussi (Ris, 1902)	I. Sivec	I. Sivec	2019-06-21	Croatia	Ševerova Cave	44.68	15.631
CROPL029-21	OK316410	BOLD:AAM5074	CNHM/CPSH71	58	Nemouridae	Amphinemura sulcicollis (Stephens, 1836)	I. Sivec	I. Sivec	2007-06-08	Croatia	Čabranka River, spring	45.601	14.64
CROPL120-21	OK316265	BOLD:ACB1865	CNHM/CPSH157	59	Nemouridae	Amphinemura triangularis (Ris, 1902)	I. Sivec	I. Sivec	2019-06-22	Croatia	Ruda, spring	43.674	16.793
CROPL121-21	OK316150	BOLD:ACB1865	CNHM/CPSH158	59	Nemouridae	Amphinemura triangularis (Ris, 1902)	I. Sivec	I. Sivec	2019-06-22	Croatia	Ruda, spring	43.674	16.793
CROPL153-21	OK316209	BOLD:ACB1865	CNHM/CPSH190	59	Nemouridae	Amphinemura triangularis (Ris, 1902)	I. Sivec	I. Sivec	2019-04-15	Croatia	Jankovac, Jankovački potok	45.519	17.669
CROPL294-21	OK316380	BOLD:AAK8087	CNHM/CPSH316	60	Nemouridae	Nemoura uncinata Despax, 1934	D. Hlebec	I. Sivec	2021-03-09	Croatia	Ivanovica Stream	45.612	17.514
CROPL164-21	OK316385	BOLD:ACB1899	CNHM/CPSH201	61	Nemouridae	Nemoura minima Aubert, 1946	I. Sivec	I. Sivec	2018-04-22	Slovenia	Zgornja Besnica, Besnica Stream	46.019	14.716
CROPL208-21	OK316257	BOLD:AAK8082	CNHM/CPSH242	62	Nemouridae	Nemoura mortoni Ris, 1902	I. Sivec	I. Sivec	2011-05-07	Slovenia	Zgornje Jezersko	46.369	14.593
CROPL070-21	OK316397	BOLD:AEH8297	CNHM/CPSH110	63	Nemouridae	Nemoura flexuosa Aubert, 1949	I. Sivec	I. Sivec	2015-03-18	Croatia	Zrinska gora, Petrinjčica Stream	45.246	16.275
CROPL075-21	OK316275	BOLD:AEH8297	CNHM/CPSH115	63	Nemouridae	Nemoura cf. rivorum	I. Sivec	I. Sivec	2015-03-18	Croatia	Zrinska gora, Petrinjčica Stream	45.246	16.275
CROPL076-21	OK316185	BOLD:AEH8297	CNHM/CPSH116	63	Nemouridae	Nemoura cf. rivorum	I. Sivec	I. Sivec	2015-03-18	Croatia	Zrinska gora, Petrinjčica Stream	45.246	16.275
CROPL095-21	OK316261	BOLD:AEH8297	CNHM/CPSH134	63	Nemouridae	Nemoura flexuosa Aubert, 1949	I. Sivec	I. Sivec	2015-03-18	Croatia	Zrinska gora, Petrinjčica Stream	45.246	16.275
CROPL162-21	OK316310	BOLD:AEH8297	CNHM/CPSH199	63	Nemouridae	Nemoura cf. rivorum	I. Sivec	I. Sivec	2019-04-14	Croatia	Sirač, Sloboština River	45.552	17.383
CROPL190-21	OK316196	BOLD:AEH8297	CNHM/CPSH224	63	Nemouridae	Nemoura flexuosa Aubert, 1949	I. Sivec	I. Sivec	2020-03-13	Croatia	Papuk, Slatinski Drenovac, Šumetlica	45.567	17.732
CROPL032-21	OK316289	BOLD:AAN1631	CNHM/CPSH74	64	Nemouridae	Nemoura marginata Pictet, 1836	I. Sivec	I. Sivec	2015-03-16	Croatia	Medvednica, Bistra Stream	45.938	15.928
CROPL040-21	OK316345	BOLD:AEH3564	CNHM/CPSH82	64	Nemouridae	Nemoura marginata Pictet, 1836	I. Sivec	I. Sivec	2015-03-30	Croatia	Vera Stream	45.069	15.373
CROPL163-21	OK316429	BOLD:AAN1631	CNHM/CPSH200	64	Nemouridae	Nemoura marginata Pictet, 1836	I. Sivec	I. Sivec	2018-04-22	Slovenia	Zgornja Besnica, Besnica Stream	46.019	14.716
CROPL288-21	OK316475	BOLD:AEK9273	CNHM/CPSH310	64	Nemouridae	Nemoura marginata Pictet, 1836	D. Hlebec	I. Sivec	2021-03-07	Croatia	Jankovac, Jankovački potok	45.519	17.669
CROPL019-21	OK316374	BOLD:AAG9376	CNHM/CPSH61	65	Nemouridae	Nemoura cinerea (Retzius, 1783)	I. Sivec	I. Sivec	2007-06-04	Croatia	Preočki most, Cetina River	43.966	16.431
CROPL047-21	OK316355	BOLD:AAG9376	CNHM/CPSH89	65	Nemouridae	Nemoura cinerea (Retzius, 1783)	I. Sivec	I. Sivec	2014-05-09	Croatia	Jamnička kiselica, Kupa River	45.549	15.876
CROPL098-21	OK316395	BOLD:AAG9376	CNHM/CPSH137	65	Nemouridae	Nemoura cinerea (Retzius, 1783)	I. Sivec	I. Sivec	2014-05-08	Croatia	Jamnička kiselica, Kupa River	45.549	15.876
CROPL107-21	OK316334	BOLD:AAG9376	CNHM/CPSH146	65	Nemouridae	Nemoura cinerea (Retzius, 1783)	I. Sivec	I. Sivec	2019-05-31	Croatia	Cetina River, Glavaš spring	43.977	16.429
CROPL108-21	OK316481	BOLD:AAG9376	CNHM/CPSH147	65	Nemouridae	Nemoura cinerea (Retzius, 1783)	I. Sivec	I. Sivec	2019-05-31	Croatia	Cetina River, Glavaš spring	43.977	16.429
CROPL015-21	OK316339	BOLD:AAP9566	CNHM/CPSH57	66	Nemouridae	Nemoura avicularis Morton, 1894	I. Sivec	I. Sivec	2015-04-08	Croatia	Vrelo, Jesenička rijeka	45.257	15.011
CROPL027-21	OK316460	BOLD:AAP9566	CNHM/CPSH69	66	Nemouridae	Nemoura avicularis Morton, 1894	I. Sivec	I. Sivec	2015-04-08	Croatia	Vrelo, Jesenička rijeka	45.257	15.011
CROPL038-21	OK316302	BOLD:AAP9566	CNHM/CPSH80	66	Nemouridae	Nemoura avicularis Morton, 1894	I. Sivec	I. Sivec	2015-04-08	Croatia	Plitvice Lakes, Korana (village)	44.924	15.615
CROPL063-21	OK316318	BOLD:AAN1631	CNHM/CPSH103	67	Nemouridae	Nemoura sciurus Aubert, 1949	I. Sivec	I. Sivec	2015-03-16	Croatia	Medvednica, Bliznec Stream	45.899	15.964
CROPL067-21	OK316317	BOLD:AED4647	CNHM/CPSH107	67	Nemouridae	Nemoura sciurus Aubert, 1949	I. Sivec	I. Sivec	2015-03-23	Croatia	Zrinska gora, Čatlan	45.193	16.407
CROPL091-21	OK316381	BOLD:AED4647	CNHM/CPSH130	67	Nemouridae	Nemoura sciurus Aubert, 1949	I. Sivec	I. Sivec	2015-03-23	Croatia	Zrinska gora, Čatlan	45.193	16.407
CROPL147-21	OK316346	BOLD:AED4647	CNHM/CPSH184	67	Nemouridae	Nemoura sciurus Aubert, 1949	I. Sivec	I. Sivec	2019-04-14	Croatia	3 km NW Gornji Vrhovci	45.486	17.562
CROPL148-21	OK316277	BOLD:AED4647	CNHM/CPSH185	67	Nemouridae	Nemoura sciurus Aubert, 1949	I. Sivec	I. Sivec	2019-04-14	Croatia	3 km NW Gornji Vrhovci	45.486	17.562
CROPL021-21	OK316398	BOLD:AAP9631	CNHM/CPSH63	68	Nemouridae	Nemoura dubitans Morton, 1894	I. Sivec	I. Sivec	2015-03-30	Croatia	Plaški, Dretulja River	45.085	15.367
CROPL025-21	OK316301	BOLD:AAP9631	CNHM/CPSH67	68	Nemouridae	Nemoura dubitans Morton, 1894	I. Sivec	I. Sivec	2015-03-30	Croatia	Plaški, Dretulja River	45.085	15.367
CROPL155-21	OK316172	BOLD:AAP9631	CNHM/CPSH192	68	Nemouridae	Nemoura dubitans Morton, 1894	I. Sivec	I. Sivec	2021-04-14	Croatia	Sirač, Sloboština River	45.552	17.383
CROPL156-21	OK316416	BOLD:AAP9631	CNHM/CPSH193	68	Nemouridae	Nemoura dubitans Morton, 1894	I. Sivec	I. Sivec	2021-04-14	Croatia	Sirač, Sloboština River	45.552	17.383
CROPL022-21	OK316341	BOLD:AEH4111	CNHM/CPSH64	69	Nemouridae	Protonemura praecox (Morton, 1894)	I. Sivec	I. Sivec	2015-04-08	Croatia	Plitvice Lakes, Korana (village)	44.924	15.615
CROPL030-21	OK316422	BOLD:AEH4111	CNHM/CPSH72	69	Nemouridae	Protonemura praecox (Morton, 1894)	I. Sivec	I. Sivec	2015-04-08	Croatia	Plitvice Lakes, Korana (village)	44.924	15.615
CROPL191-21	OK316450	BOLD:AEH7722	CNHM/CPSH225	69	Nemouridae	Protonemura praecox (Morton, 1894)	I. Sivec	I. Sivec	2020-03-14	Croatia	Jankovac, Jankovački potok	45.519	17.669
CROPL192-21	OK316250	BOLD:AEH7722	CNHM/CPSH226	69	Nemouridae	Protonemura praecox (Morton, 1894)	I. Sivec	I. Sivec	2020-03-14	Croatia	Jankovac, Jankovački potok	45.519	17.669
CROPL323-21	OK316350	BOLD:AEH4111	CNHM/CPSH344	69	Nemouridae	Protonemura praecox (Morton, 1894)	I. Sivec	I. Sivec	2019-03-17	Croatia	Plitvice Stream	44.902	15.574
CROPL324-21	OK316169	BOLD:AEH4111	CNHM/CPSH345	69	Nemouridae	Protonemura praecox (Morton, 1894)	I. Sivec	I. Sivec	2019-03-17	Croatia	Plitvička jezera, Sartuk Stream	44.906	15.579
CROPL024-21	OK316470	BOLD:AAM9758	CNHM/CPSH66	70	Nemouridae	Protonemura intricata (Ris, 1902)	I. Sivec	I. Sivec	2015-03-30	Croatia	Vera Stream	45.069	15.373
CROPL043-21	OK316387	BOLD:AAM9758	CNHM/CPSH85	70	Nemouridae	Protonemura intricata (Ris, 1902)	I. Sivec	I. Sivec	2007-06-08	Croatia	Skrad, Zeleni vir	45.426	14.893
CROPL100-21	OK316445	BOLD:AAM9758	CNHM/CPSH139	70	Nemouridae	Protonemura intricata (Ris, 1902)	I. Sivec	I. Sivec	2019-05-02	Croatia	Čabar, Mandli, Čabranka River	45.555	14.69
CROPL103-21	OK316305	BOLD:AAM9758	CNHM/CPSH142	70	Nemouridae	Protonemura intricata (Ris, 1902)	I. Sivec	I. Sivec	2019-05-02	Croatia	Čabar, Mandli, Čabranka River	45.555	14.69
CROPL034-21	OK316473	BOLD:ADR0060	CNHM/CPSH76	71	Nemouridae	Protonemura hrabei Raušer, 1956	I. Sivec	I. Sivec	2007-10-13	Croatia	Zrmanja River, spring	44.204	16.087
CROPL069-21	OK316290	BOLD:ADR0060	CNHM/CPSH109	71	Nemouridae	Protonemura hrabei Raušer, 1956	I. Sivec	I. Sivec	2007-10-08	Croatia	Zrmanja River, spring	44.204	16.087
CROPL345-21	OK316371	BOLD:ADR0060	CNHM/CPSH365	71	Nemouridae	Protonemura hrabei Raušer, 1956	D. Hlebec	I. Sivec	2021-05-31	Croatia	Cetina River, Preočani spring	43.968	16.431
CROPL170-21	OK316246	BOLD:AEL3274	CNHM/CPSH207	72	Nemouridae	Protonemura cf. autumnalis	D. Hlebec	I. Sivec	2019-10-26	Croatia	Plitvice Lakes, Bijela rijeka spring	44.839	15.578
CROPL080-21	OK316259	BOLD:AED9051	CNHM/CPSH120	73	Nemouridae	Protonemura nitida (Pictet, 1836)	I. Sivec	I. Sivec	2014-10-19	Croatia	Plitvice Lakes, Riječica Stream	44.839	15.578
CROPL160-21	OK316164	BOLD:AED9051	CNHM/CPSH197	73	Nemouridae	Protonemura nitida (Pictet, 1836)	I. Sivec	I. Sivec	2019-10-13	Croatia	Čabranka River, spring	45.601	14.64
CROPL161-21	OK316365	BOLD:AED9051	CNHM/CPSH198	73	Nemouridae	Protonemura nitida (Pictet, 1836)	I. Sivec	I. Sivec	2019-10-13	Croatia	Čabranka River, spring	45.601	14.64
CROPL174-21	OK316186	BOLD:AED9051	CNHM/CPSH211	73	Nemouridae	Protonemura nitida (Pictet, 1836)	D. Hlebec	I. Sivec	2019-10-27	Croatia	Dretulja, spring	45.075	15.343
CROPL010-21	OK316469	BOLD:AAH7653	CNHM/CPSH52	74	Nemouridae	Protonemura auberti Illies, 1954	I. Sivec	I. Sivec	2015-04-10	Croatia	Plitvice Stream	44.902	15.574
CROPL039-21	OK316201	BOLD:AAH7653	CNHM/CPSH81	74	Nemouridae	Protonemura auberti Illies, 1954	I. Sivec	I. Sivec	2015-04-10	Croatia	Plitvice Stream	44.902	15.574
CROPL077-21	OK316464	BOLD:AAH7653	CNHM/CPSH117	74	Nemouridae	Protonemura auberti Illies, 1954	I. Sivec	I. Sivec	2014-10-19	Croatia	Plitvice Stream	44.902	15.574
CROPL083-21	OK316439	BOLD:AAH7653	CNHM/CPSH123	74	Nemouridae	Protonemura auberti Illies, 1954	I. Sivec	I. Sivec	2014-10-19	Croatia	Plitvice Stream	44.902	15.574
CROPL114-21	OK316156	BOLD:AAH7653	CNHM/CPSH153	74	Nemouridae	Protonemura auberti Illies, 1954	I. Sivec	I. Sivec	2019-06-20	Croatia	Plitvice Lakes, Bijela rijeka spring	44.839	15.578
CROPL126-21	OK316255	BOLD:AAH7653	CNHM/CPSH163	74	Nemouridae	Protonemura auberti Illies, 1954	I. Sivec	I. Sivec	2019-06-20	Croatia	Plitvice Lakes, Drakulić rijeka, spring	44.781	15.658
CROPL150-21	OK316391	BOLD:AAH7653	CNHM/CPSH187	74	Nemouridae	Protonemura auberti Illies, 1954	I. Sivec	I. Sivec	2019-04-13	Croatia	Kovačica, spring	45.519	17.669
CROPL166-21	OK316266	BOLD:AAH7653	CNHM/CPSH203	74	Nemouridae	Protonemura auberti Illies, 1954	D. Hlebec	I. Sivec	2019-10-26	Croatia	Plitvice Lakes, Crna rijeka spring	44.836	15.606
CROPL169-21	OK316262	BOLD:AAH7653	CNHM/CPSH206	74	Nemouridae	Protonemura auberti Illies, 1954	D. Hlebec	I. Sivec	2019-10-26	Croatia	Plitvice Lakes, Bijela rijeka spring	44.839	15.578
CROPL213-21	OK316421	BOLD:AAH7653	CNHM/CPSH247	74	Nemouridae	Protonemura auberti Illies, 1954	M. Kučinić, I. Vučković	I. Sivec	2020-06-23	Croatia	Plitvice Lakes, Drakulić rijeka, spring	44.781	15.658
CROPL215-21	OK316296	BOLD:AAH7653	CNHM/CPSH249	74	Nemouridae	Protonemura auberti Illies, 1954	M. Kučinić, I. Vučković	I. Sivec	2020-06-23	Croatia	Plitvice Lakes, Drakulić rijeka, spring	44.781	15.658
CROPL226-21	OK316200	BOLD:AAH7653	CNHM/CPSH260	74	Nemouridae	Protonemura auberti Illies, 1954	M. Kučinić	I. Sivec	2017-07-17	Croatia	Jankovac, Jankovački potok	45.519	17.669
CROPL227-21	OK316203	BOLD:AAH7653	CNHM/CPSH261	74	Nemouridae	Protonemura auberti Illies, 1954	D. Hlebec	I. Sivec	2020-06-07	Croatia	Ivanščica, Šumi Stream	46.19	16.104
CROPL257-21	OK316384	BOLD:AAH7653	CNHM/CPSH279	74	Nemouridae	Protonemura auberti Illies, 1954	D. Hlebec	I. Sivec	2021-02-27	Croatia	Una River, spring	44.399	16.108
CROPL258-21	OK316279	BOLD:AAH7653	CNHM/CPSH280	74	Nemouridae	Protonemura auberti Illies, 1954	D. Hlebec	I. Sivec	2021-02-27	Croatia	Una River, spring	44.399	16.108
CROPL281-21	OK316303	BOLD:AAH7653	CNHM/CPSH303	74	Nemouridae	Protonemura auberti Illies, 1954	D. Hlebec	I. Sivec	2021-02-27	Croatia	Una River, spring	44.399	16.108
CROPL286-21	OK316219	BOLD:AAH7653	CNHM/CPSH308	74	Nemouridae	Protonemura auberti Illies, 1954	S. Žalac	I. Sivec	2019-10-01	Croatia	Plitvice Lakes, Drakulić rijeka, spring	44.781	15.658
CROPL372-21	OK316191	BOLD:AAH7653	CNHM/CPSH392	74	Nemouridae	Protonemura auberti Illies, 1954	L. Kladarić	I. Sivec	2021-06-25	Croatia	Ivanščica, Šumi Stream	46.189	16.157
