# Supplementary material for: DNA barcoding for biodiversity assessment: Croatian stoneflies (Insecta: Plecoptera)
Source: PeerJ. 2022 Apr 20;10:e13213. doi: 10.7717/peerj.13213 (PMC9034701; doi:10.7717/peerj.13213)
Supplement: Supplemental Information 9 — Values were obtained through complete deletion option. Intraspecific p-distances are outlined by the black line. [file peerj-10-13213-s009.xlsx]

## Sheet: Sheet1
	Agnetina elegantula	Marthamea vitripennis	Amphinemura standfussi	Amphinemura sulcicollis	Amphinemura triangularis	Protonemura auberti	Protonemura cf. autumnalis	Protonemura hrabei	Protonemura nitida	Protonemura praecox	Protonemura intricata	Nemoura avicularis	Nemoura dubitans	Nemoura sciurus	Nemoura flexuosa/Nemoura cf. rivorum	Nemoura marginata	Nemoura minima	Nemoura mortoni	Nemoura uncinata	Nemoura cinerea	Isoperla albanica	Isoperla bosnica	Isoperla grammatica	Isoperla illyrica	Isoperla tripartita	Isoperla goertzi	Isoperla cf. lugens	Isoperla rivulorum	Isoperla popijaci	Isoperla inermis	Taeniopteryx n.sp. CRO-1	Taeniopteryx hubaulti	Taeniopteryx schoenemundi	Taeniopteryx nebulosa	Nemurella picteti	Brachyptera monilicornis	Brachyptera seticornis	Brachyptera tristis	Brachyptera risi	Rhabdiopteryx acuminata	Zwicknia bifrons	Zwicknia rupprechti	Perlodes dispar	Perlodes microcephalus	Perlodes intricatus	Besdolus imhoffi	Siphonoperla taurica	Siphonoperla torrentium	Xanthoperla apicalis
Agnetina elegantula
Marthamea vitripennis	0.150912
Amphinemura standfussi	0.205638	0.195688
Amphinemura sulcicollis	0.21393	0.215589	0.165837
Amphinemura triangularis	0.18408	0.197347	0.154229	0.117745	0.0165837
Protonemura auberti	0.189055	0.208955	0.19403	0.195688	0.199005	0.01
Protonemura cf. autumnalis	0.195688	0.192371	0.185738	0.19403	0.197347	0.135987
Protonemura hrabei	0.190713	0.182421	0.169154	0.174129	0.179104	0.12272	0.0829187	0.00331675
Protonemura nitida	0.189055	0.195688	0.172471	0.187396	0.18408	0.129353	0.0829187	0.0679934	0.00165837
Protonemura praecox	0.189055	0.19403	0.159204	0.192371	0.179104	0.150912	0.135987	0.135987	0.127695	0.008
Protonemura intricata	0.187396	0.207297	0.182421	0.180763	0.185738	0.162521	0.167496	0.139303	0.15257	0.155887	0.00856827
Nemoura avicularis	0.170813	0.190713	0.179104	0.175788	0.164179	0.167496	0.160862	0.160862	0.179104	0.177446	0.162521	0.00552792
Nemoura dubitans	0.19403	0.19403	0.179104	0.174129	0.167496	0.185738	0.185738	0.160862	0.187396	0.175788	0.172471	0.109453	0.00608071
Nemoura sciurus	0.190713	0.200663	0.154229	0.164179	0.159204	0.172471	0.165837	0.150912	0.172471	0.177446	0.182421	0.107794	0.0995025	0.00359315
Nemoura flexuosa/Nemoura cf. rivorum	0.199005	0.208955	0.160862	0.179104	0.164179	0.190713	0.179104	0.164179	0.182421	0.179104	0.175788	0.13267	0.140962	0.124378	0.000552792
Nemoura marginata	0.192371	0.208955	0.169154	0.179104	0.165837	0.192371	0.175788	0.162521	0.177446	0.162521	0.174129	0.121061	0.129353	0.127695	0.0995025	0.0305141
Nemoura minima	0.175788	0.189055	0.164179	0.177446	0.157546	0.169154	0.169154	0.159204	0.177446	0.162521	0.179104	0.12272	0.140962	0.127695	0.117745	0.109453
Nemoura mortoni	0.195688	0.205638	0.179104	0.170813	0.159204	0.190713	0.185738	0.165837	0.192371	0.172471	0.189055	0.140962	0.15257	0.144279	0.114428	0.126036	0.0995025
Nemoura uncinata	0.202322	0.189055	0.179104	0.199005	0.19403	0.195688	0.179104	0.165837	0.177446	0.174129	0.179104	0.139303	0.137645	0.145937	0.135987	0.13267	0.12272	0.135987
Nemoura cinerea	0.190713	0.21393	0.190713	0.169154	0.157546	0.182421	0.189055	0.170813	0.185738	0.179104	0.189055	0.14262	0.139303	0.144279	0.159204	0.160862	0.14262	0.169154	0.170813	0.015257
Isoperla albanica	0.19403	0.187396	0.200663	0.180763	0.19403	0.212272	0.192371	0.177446	0.199005	0.185738	0.177446	0.192371	0.197347	0.21393	0.19403	0.187396	0.197347	0.205638	0.205638	0.222222	0.00497512
Isoperla bosnica	0.20398	0.179104	0.197347	0.19403	0.190713	0.205638	0.182421	0.165837	0.182421	0.180763	0.177446	0.190713	0.197347	0.20398	0.200663	0.18408	0.192371	0.202322	0.195688	0.222222	0.0630182	0.0026534
Isoperla grammatica	0.207297	0.189055	0.215589	0.19403	0.189055	0.212272	0.185738	0.174129	0.197347	0.187396	0.180763	0.197347	0.20398	0.208955	0.200663	0.187396	0.192371	0.20398	0.19403	0.217247	0.0679934	0.0414594	0.0132301
Isoperla illyrica	0.208955	0.202322	0.200663	0.190713	0.192371	0.210614	0.192371	0.179104	0.199005	0.20398	0.187396	0.199005	0.192371	0.205638	0.200663	0.199005	0.212272	0.212272	0.21393	0.218905	0.0729685	0.0762852	0.0829187	0.0320619
Isoperla tripartita	0.197347	0.177446	0.20398	0.177446	0.195688	0.215589	0.19403	0.180763	0.200663	0.185738	0.18408	0.195688	0.197347	0.200663	0.200663	0.179104	0.202322	0.199005	0.212272	0.215589	0.0696517	0.0696517	0.0746269	0.0580431	0.0177114
Isoperla goertzi	0.21393	0.210614	0.20398	0.190713	0.197347	0.21393	0.202322	0.190713	0.202322	0.202322	0.197347	0.190713	0.200663	0.212272	0.215589	0.202322	0.208955	0.215589	0.215589	0.230514	0.0812604	0.0762852	0.0845771	0.0845771	0.0829187
Isoperla cf. lugens	0.210614	0.202322	0.195688	0.19403	0.192371	0.210614	0.195688	0.192371	0.19403	0.187396	0.189055	0.20398	0.19403	0.207297	0.20398	0.185738	0.200663	0.210614	0.215589	0.207297	0.119403	0.116086	0.117745	0.124378	0.119403	0.129353	0.00797483
Isoperla rivulorum	0.19403	0.19403	0.187396	0.182421	0.180763	0.217247	0.20398	0.185738	0.179104	0.187396	0.172471	0.18408	0.182421	0.202322	0.197347	0.175788	0.18408	0.202322	0.20398	0.197347	0.116086	0.114428	0.117745	0.111111	0.111111	0.111111	0.067335	0.0110558
Isoperla popijaci	0.195688	0.195688	0.205638	0.18408	0.179104	0.215589	0.197347	0.174129	0.195688	0.195688	0.175788	0.179104	0.182421	0.20398	0.190713	0.175788	0.172471	0.18408	0.20398	0.190713	0.102819	0.109453	0.104478	0.104478	0.106136	0.112769	0.0829187	0.0679934	0.000414594
Isoperla inermis	0.195688	0.210614	0.177446	0.197347	0.187396	0.195688	0.175788	0.165837	0.179104	0.182421	0.190713	0.185738	0.190713	0.182421	0.190713	0.170813	0.170813	0.199005	0.190713	0.197347	0.144279	0.129353	0.149254	0.135987	0.134328	0.144279	0.14262	0.126036	0.112769	0.0215769
Taeniopteryx n.sp. CRO-1	0.18408	0.197347	0.164179	0.177446	0.155887	0.207297	0.180763	0.172471	0.177446	0.175788	0.165837	0.175788	0.174129	0.164179	0.162521	0.170813	0.165837	0.182421	0.18408	0.190713	0.177446	0.18408	0.189055	0.192371	0.192371	0.195688	0.179104	0.180763	0.162521	0.169154	0.00880214
Taeniopteryx hubaulti	0.192371	0.212272	0.180763	0.185738	0.165837	0.187396	0.19403	0.179104	0.180763	0.197347	0.172471	0.172471	0.165837	0.160862	0.177446	0.154229	0.164179	0.172471	0.190713	0.19403	0.192371	0.195688	0.200663	0.189055	0.190713	0.210614	0.200663	0.195688	0.179104	0.172471	0.0779436
Taeniopteryx schoenemundi	0.190713	0.202322	0.167496	0.18408	0.165837	0.190713	0.19403	0.170813	0.18408	0.170813	0.175788	0.169154	0.157546	0.164179	0.172471	0.172471	0.169154	0.179104	0.182421	0.18408	0.187396	0.195688	0.199005	0.192371	0.19403	0.21393	0.195688	0.190713	0.175788	0.187396	0.0746269	0.0729685	0.0113322
Taeniopteryx nebulosa	0.19403	0.197347	0.177446	0.180763	0.169154	0.190713	0.174129	0.162521	0.165837	0.175788	0.174129	0.15257	0.157546	0.159204	0.170813	0.165837	0.15257	0.187396	0.18408	0.177446	0.179104	0.175788	0.185738	0.182421	0.18408	0.195688	0.185738	0.179104	0.162521	0.167496	0.0945274	0.0945274	0.0978441	0.00563847
Nemurella picteti	0.195688	0.197347	0.172471	0.179104	0.170813	0.192371	0.18408	0.175788	0.19403	0.165837	0.177446	0.15257	0.172471	0.164179	0.145937	0.170813	0.162521	0.180763	0.18408	0.159204	0.162521	0.154229	0.167496	0.174129	0.174129	0.167496	0.177446	0.172471	0.162521	0.172471	0.149254	0.169154	0.170813	0.157546	0.00641238
Brachyptera monilicornis	0.195688	0.192371	0.182421	0.177446	0.167496	0.180763	0.170813	0.169154	0.18408	0.180763	0.179104	0.165837	0.170813	0.167496	0.197347	0.177446	0.164179	0.192371	0.197347	0.180763	0.179104	0.185738	0.192371	0.18408	0.187396	0.180763	0.190713	0.180763	0.180763	0.180763	0.167496	0.164179	0.160862	0.159204	0.175788	0.00486457
Brachyptera seticornis	0.200663	0.220564	0.189055	0.185738	0.18408	0.205638	0.195688	0.177446	0.195688	0.197347	0.189055	0.190713	0.195688	0.195688	0.19403	0.19403	0.177446	0.189055	0.190713	0.200663	0.195688	0.210614	0.210614	0.21393	0.215589	0.215589	0.223881	0.207297	0.202322	0.199005	0.159204	0.175788	0.159204	0.169154	0.172471	0.127695	0.013267
Brachyptera tristis	0.220564	0.215589	0.190713	0.202322	0.208955	0.20398	0.200663	0.202322	0.205638	0.200663	0.190713	0.20398	0.202322	0.174129	0.200663	0.195688	0.218905	0.20398	0.20398	0.212272	0.212272	0.220564	0.218905	0.20398	0.202322	0.220564	0.202322	0.208955	0.20398	0.217247	0.160862	0.199005	0.182421	0.187396	0.189055	0.169154	0.190713	0.007285
Brachyptera risi	0.192371	0.197347	0.189055	0.189055	0.174129	0.197347	0.199005	0.177446	0.175788	0.175788	0.189055	0.175788	0.195688	0.180763	0.182421	0.195688	0.182421	0.189055	0.192371	0.200663	0.192371	0.189055	0.185738	0.185738	0.18408	0.199005	0.202322	0.192371	0.190713	0.189055	0.167496	0.189055	0.177446	0.172471	0.172471	0.135987	0.157546	0.164179	0.00302517
Rhabdiopteryx acuminata	0.20398	0.210614	0.20398	0.208955	0.207297	0.199005	0.200663	0.199005	0.192371	0.195688	0.199005	0.202322	0.199005	0.180763	0.18408	0.185738	0.197347	0.217247	0.199005	0.20398	0.202322	0.200663	0.205638	0.20398	0.20398	0.218905	0.21393	0.208955	0.202322	0.187396	0.165837	0.18408	0.195688	0.182421	0.192371	0.170813	0.189055	0.175788	0.172471	0.00525152
Zwicknia bifrons	0.197347	0.182421	0.199005	0.200663	0.187396	0.187396	0.172471	0.159204	0.177446	0.177446	0.170813	0.167496	0.164179	0.160862	0.167496	0.157546	0.165837	0.170813	0.177446	0.18408	0.167496	0.162521	0.169154	0.179104	0.175788	0.179104	0.18408	0.179104	0.169154	0.174129	0.164179	0.170813	0.167496	0.160862	0.150912	0.150912	0.197347	0.175788	0.185738	0.160862	0.00773908
Zwicknia rupprechti	0.199005	0.19403	0.185738	0.190713	0.170813	0.185738	0.18408	0.167496	0.180763	0.174129	0.170813	0.180763	0.169154	0.154229	0.177446	0.170813	0.169154	0.175788	0.187396	0.18408	0.177446	0.172471	0.179104	0.180763	0.180763	0.187396	0.189055	0.179104	0.182421	0.179104	0.175788	0.18408	0.174129	0.165837	0.160862	0.144279	0.197347	0.180763	0.15257	0.165837	0.0878939	0.00165837
Perlodes dispar	0.190713	0.208955	0.19403	0.195688	0.18408	0.207297	0.189055	0.170813	0.174129	0.205638	0.207297	0.189055	0.205638	0.192371	0.207297	0.217247	0.21393	0.208955	0.220564	0.208955	0.18408	0.187396	0.207297	0.182421	0.18408	0.195688	0.190713	0.177446	0.175788	0.172471	0.18408	0.18408	0.199005	0.182421	0.182421	0.179104	0.20398	0.223881	0.179104	0.199005	0.175788	0.18408	0.00497512
Perlodes microcephalus	0.20398	0.222222	0.19403	0.217247	0.202322	0.217247	0.199005	0.18408	0.174129	0.200663	0.225539	0.208955	0.232172	0.202322	0.218905	0.232172	0.212272	0.210614	0.230514	0.218905	0.199005	0.199005	0.21393	0.190713	0.189055	0.199005	0.20398	0.179104	0.189055	0.175788	0.18408	0.192371	0.212272	0.190713	0.199005	0.185738	0.20398	0.202322	0.18408	0.19403	0.175788	0.197347	0.0878939	0.0245439
Perlodes intricatus	0.200663	0.200663	0.18408	0.205638	0.200663	0.223881	0.199005	0.187396	0.187396	0.207297	0.230514	0.205638	0.212272	0.189055	0.19403	0.207297	0.199005	0.195688	0.212272	0.212272	0.199005	0.200663	0.215589	0.192371	0.195688	0.20398	0.192371	0.18408	0.179104	0.180763	0.187396	0.199005	0.212272	0.192371	0.190713	0.179104	0.19403	0.20398	0.180763	0.190713	0.189055	0.197347	0.111111	0.104478	0.00497512
Besdolus imhoffi	0.197347	0.195688	0.172471	0.202322	0.190713	0.225539	0.21393	0.199005	0.210614	0.20398	0.205638	0.200663	0.190713	0.210614	0.19403	0.202322	0.195688	0.205638	0.189055	0.208955	0.169154	0.175788	0.189055	0.180763	0.179104	0.195688	0.170813	0.164179	0.175788	0.182421	0.179104	0.192371	0.189055	0.175788	0.205638	0.217247	0.208955	0.21393	0.215589	0.207297	0.207297	0.202322	0.179104	0.165837	0.175788	0.0053068
Siphonoperla taurica	0.177446	0.169154	0.192371	0.165837	0.167496	0.225539	0.180763	0.174129	0.185738	0.199005	0.192371	0.174129	0.18408	0.147595	0.179104	0.179104	0.175788	0.18408	0.187396	0.19403	0.19403	0.192371	0.199005	0.189055	0.189055	0.195688	0.19403	0.179104	0.18408	0.179104	0.177446	0.177446	0.18408	0.174129	0.195688	0.165837	0.190713	0.185738	0.182421	0.189055	0.164179	0.170813	0.174129	0.189055	0.185738	0.197347
Siphonoperla torrentium	0.182421	0.182421	0.202322	0.172471	0.162521	0.20398	0.200663	0.180763	0.197347	0.21393	0.189055	0.187396	0.199005	0.172471	0.19403	0.200663	0.182421	0.199005	0.207297	0.187396	0.200663	0.197347	0.200663	0.190713	0.190713	0.199005	0.177446	0.170813	0.169154	0.189055	0.167496	0.179104	0.18408	0.182421	0.192371	0.185738	0.190713	0.197347	0.202322	0.202322	0.192371	0.195688	0.174129	0.190713	0.200663	0.199005	0.107794	0.00165837
Xanthoperla apicalis	0.202322	0.19403	0.190713	0.202322	0.187396	0.212272	0.205638	0.179104	0.185738	0.197347	0.192371	0.195688	0.205638	0.174129	0.19403	0.192371	0.189055	0.20398	0.19403	0.21393	0.195688	0.18408	0.185738	0.19403	0.192371	0.210614	0.175788	0.187396	0.187396	0.19403	0.164179	0.180763	0.180763	0.187396	0.179104	0.197347	0.210614	0.180763	0.185738	0.187396	0.187396	0.189055	0.190713	0.197347	0.20398	0.190713	0.149254	0.147595
Capnopsis schilleri balcanica	0.205638	0.187396	0.175788	0.199005	0.192371	0.19403	0.189055	0.18408	0.195688	0.192371	0.190713	0.179104	0.192371	0.177446	0.202322	0.200663	0.189055	0.190713	0.202322	0.202322	0.175788	0.177446	0.185738	0.180763	0.182421	0.19403	0.185738	0.179104	0.162521	0.170813	0.172471	0.169154	0.18408	0.164179	0.175788	0.165837	0.180763	0.174129	0.172471	0.197347	0.190713	0.192371	0.205638	0.19403	0.205638	0.202322	0.177446	0.190713	0.189055
Leuctra albida	0.210614	0.207297	0.164179	0.185738	0.189055	0.199005	0.192371	0.177446	0.179104	0.190713	0.192371	0.192371	0.195688	0.18408	0.18408	0.19403	0.18408	0.19403	0.202322	0.190713	0.197347	0.192371	0.200663	0.207297	0.208955	0.207297	0.18408	0.190713	0.175788	0.190713	0.174129	0.195688	0.187396	0.177446	0.177446	0.180763	0.187396	0.190713	0.182421	0.197347	0.202322	0.195688	0.190713	0.190713	0.19403	0.189055	0.20398	0.199005	0.195688
Leuctra mortoni	0.199005	0.208955	0.164179	0.19	0.187396	0.19403	0.187396	0.172471	0.174129	0.190713	0.190713	0.189055	0.189055	0.18408	0.182421	0.192371	0.18408	0.195688	0.205638	0.187396	0.19403	0.18408	0.195688	0.200663	0.200663	0.200663	0.179104	0.179104	0.174129	0.190713	0.170813	0.187396	0.185738	0.174129	0.175788	0.174129	0.180763	0.19403	0.172471	0.197347	0.19403	0.192371	0.180763	0.180763	0.18408	0.189055	0.202322	0.190713	0.19403
Leuctra fusca	0.21393	0.21393	0.177446	0.197347	0.185738	0.199005	0.199005	0.187396	0.190713	0.197347	0.195688	0.195688	0.200663	0.190713	0.200663	0.21393	0.190713	0.20398	0.220564	0.200663	0.20398	0.195688	0.197347	0.212272	0.21393	0.212272	0.187396	0.187396	0.18408	0.200663	0.19403	0.197347	0.190713	0.177446	0.19403	0.185738	0.195688	0.205638	0.202322	0.205638	0.207297	0.195688	0.195688	0.192371	0.208955	0.187396	0.200663	0.197347	0.199005
Leuctra sp.	0.210614	0.20398	0.172471	0.187396	0.189055	0.19403	0.190713	0.174129	0.182421	0.185738	0.192371	0.197347	0.197347	0.195688	0.190713	0.202322	0.190713	0.200663	0.208955	0.190713	0.19403	0.189055	0.199005	0.200663	0.200663	0.208955	0.187396	0.18408	0.170813	0.180763	0.179104	0.19403	0.187396	0.172471	0.18408	0.175788	0.172471	0.19403	0.177446	0.197347	0.197347	0.19403	0.182421	0.185738	0.195688	0.197347	0.197347	0.19403	0.187396
Leuctra digitata	0.210614	0.200663	0.167496	0.189055	0.192371	0.20398	0.185738	0.175788	0.179104	0.189055	0.205638	0.190713	0.197347	0.187396	0.190713	0.197347	0.190713	0.19403	0.210614	0.190713	0.190713	0.180763	0.187396	0.190713	0.192371	0.197347	0.182421	0.179104	0.172471	0.18408	0.170813	0.197347	0.189055	0.174129	0.180763	0.177446	0.192371	0.192371	0.174129	0.199005	0.19403	0.18408	0.180763	0.179104	0.187396	0.195688	0.197347	0.202322	0.190713
Leuctra cingulata	0.199005	0.202322	0.190713	0.200663	0.200663	0.202322	0.212272	0.195688	0.175788	0.202322	0.195688	0.182421	0.189055	0.187396	0.187396	0.199005	0.190713	0.200663	0.21393	0.187396	0.18408	0.18408	0.190713	0.197347	0.195688	0.195688	0.195688	0.189055	0.172471	0.185738	0.174129	0.18408	0.185738	0.175788	0.190713	0.182421	0.199005	0.192371	0.192371	0.19403	0.190713	0.200663	0.179104	0.185738	0.192371	0.199005	0.192371	0.180763	0.19403
Leuctra major	0.197347	0.19403	0.185738	0.202322	0.205638	0.208955	0.21393	0.190713	0.202322	0.20398	0.199005	0.19403	0.192371	0.189055	0.197347	0.192371	0.187396	0.197347	0.207297	0.20398	0.19403	0.190713	0.199005	0.207297	0.205638	0.205638	0.200663	0.197347	0.185738	0.18408	0.172471	0.179104	0.190713	0.18408	0.200663	0.185738	0.202322	0.200663	0.182421	0.195688	0.180763	0.195688	0.185738	0.180763	0.197347	0.208955	0.18408	0.190713	0.197347
Leuctra bronislawi	0.207297	0.207297	0.174129	0.180763	0.180763	0.202322	0.197347	0.180763	0.200663	0.18408	0.182421	0.192371	0.199005	0.192371	0.205638	0.197347	0.197347	0.212272	0.215589	0.207297	0.182421	0.174129	0.174129	0.185738	0.185738	0.187396	0.187396	0.170813	0.179104	0.172471	0.189055	0.189055	0.185738	0.175788	0.182421	0.177446	0.172471	0.20398	0.175788	0.195688	0.189055	0.182421	0.19403	0.205638	0.200663	0.200663	0.175788	0.195688	0.192371
Leuctra hirsuta	0.208955	0.212272	0.189055	0.207297	0.207297	0.225539	0.195688	0.182421	0.192371	0.20398	0.205638	0.185738	0.185738	0.18408	0.195688	0.218905	0.200663	0.20398	0.197347	0.202322	0.202322	0.205638	0.208955	0.205638	0.207297	0.200663	0.197347	0.19403	0.18408	0.174129	0.175788	0.192371	0.192371	0.172471	0.197347	0.200663	0.205638	0.210614	0.200663	0.197347	0.200663	0.21393	0.180763	0.177446	0.187396	0.189055	0.195688	0.197347	0.217247
Leuctra inermis	0.2	0.20398	0.19403	0.19	0.19403	0.200663	0.195688	0.189055	0.199005	0.190713	0.190713	0.170813	0.174129	0.180763	0.190713	0.174129	0.180763	0.19403	0.189055	0.179104	0.177446	0.162521	0.177446	0.190713	0.192371	0.187396	0.192371	0.180763	0.172471	0.199005	0.174129	0.175788	0.167496	0.164179	0.169154	0.192371	0.180763	0.199005	0.199005	0.199005	0.175788	0.187396	0.182421	0.200663	0.205638	0.20398	0.189055	0.179104	0.20398
Leuctra cf. inermis	0.2	0.210614	0.19403	0.2	0.208955	0.20398	0.207297	0.19403	0.199005	0.195688	0.20398	0.18408	0.182421	0.172471	0.20398	0.187396	0.199005	0.202322	0.208955	0.187396	0.175788	0.175788	0.182421	0.190713	0.192371	0.192371	0.195688	0.180763	0.179104	0.192371	0.189055	0.174129	0.179104	0.172471	0.185738	0.192371	0.192371	0.199005	0.20398	0.202322	0.18408	0.197347	0.192371	0.207297	0.215589	0.207297	0.192371	0.180763	0.208955
Leuctra rauscheri	0.20398	0.21393	0.200663	0.217247	0.208955	0.210614	0.210614	0.197347	0.208955	0.207297	0.185738	0.170813	0.182421	0.187396	0.208955	0.207297	0.199005	0.207297	0.212272	0.177446	0.197347	0.185738	0.190713	0.205638	0.21393	0.210614	0.218905	0.195688	0.185738	0.202322	0.192371	0.190713	0.172471	0.165837	0.177446	0.200663	0.192371	0.218905	0.207297	0.21393	0.182421	0.197347	0.192371	0.20398	0.215589	0.212272	0.200663	0.197347	0.208955
Leuctra cf. prima	0.205638	0.202322	0.195688	0.207297	0.20398	0.190713	0.197347	0.180763	0.20398	0.199005	0.189055	0.177446	0.200663	0.187396	0.179104	0.185738	0.19403	0.187396	0.215589	0.190713	0.20398	0.210614	0.210614	0.210614	0.208955	0.21393	0.212272	0.207297	0.20398	0.192371	0.189055	0.180763	0.189055	0.18408	0.182421	0.187396	0.175788	0.19403	0.202322	0.215589	0.189055	0.189055	0.205638	0.20398	0.205638	0.215589	0.180763	0.187396	0.19403
Leuctra prima	0.212272	0.190713	0.189055	0.200663	0.199005	0.189055	0.19403	0.172471	0.192371	0.197347	0.190713	0.182421	0.182421	0.179104	0.190713	0.195688	0.185738	0.180763	0.208955	0.19403	0.205638	0.212272	0.218905	0.222222	0.227197	0.220564	0.210614	0.21393	0.195688	0.200663	0.185738	0.189055	0.189055	0.185738	0.177446	0.18408	0.18408	0.192371	0.202322	0.205638	0.179104	0.187396	0.20398	0.205638	0.210614	0.222222	0.180763	0.182421	0.200663
Leuctra nigra	0.190713	0.189055	0.189055	0.19403	0.187396	0.195688	0.197347	0.180763	0.199005	0.177446	0.195688	0.169154	0.174129	0.177446	0.197347	0.190713	0.189055	0.195688	0.182421	0.180763	0.185738	0.180763	0.187396	0.19403	0.19403	0.197347	0.189055	0.177446	0.177446	0.190713	0.185738	0.199005	0.177446	0.170813	0.182421	0.18408	0.19403	0.189055	0.19403	0.217247	0.18408	0.170813	0.185738	0.205638	0.200663	0.202322	0.18408	0.19403	0.210614
Leuctra sp. Z	0.232172	0.207297	0.195688	0.205638	0.208955	0.212272	0.210614	0.189055	0.210614	0.207297	0.215589	0.215589	0.200663	0.190713	0.217247	0.220564	0.20398	0.197347	0.215589	0.190713	0.21393	0.20398	0.212272	0.217247	0.215589	0.218905	0.215589	0.199005	0.199005	0.205638	0.200663	0.212272	0.19403	0.205638	0.190713	0.179104	0.190713	0.189055	0.208955	0.223881	0.199005	0.189055	0.205638	0.19403	0.192371	0.20398	0.202322	0.220564	0.202322
Leuctra hippopus	0.202322	0.197347	0.165837	0.208955	0.19403	0.190713	0.18408	0.164179	0.177446	0.18408	0.177446	0.175788	0.175788	0.170813	0.175788	0.180763	0.180763	0.189055	0.200663	0.175788	0.19403	0.185738	0.19403	0.197347	0.199005	0.202322	0.199005	0.190713	0.185738	0.172471	0.164179	0.162521	0.165837	0.160862	0.160862	0.18408	0.179104	0.199005	0.205638	0.210614	0.190713	0.187396	0.190713	0.190713	0.190713	0.197347	0.179104	0.187396	0.195688
Perla abdominalis	0.210614	0.202322	0.218905	0.217247	0.212272	0.225539	0.235489	0.20398	0.222222	0.217247	0.202322	0.195688	0.200663	0.207297	0.202322	0.205638	0.197347	0.200663	0.20398	0.205638	0.212272	0.207297	0.21393	0.208955	0.207297	0.208955	0.217247	0.200663	0.199005	0.200663	0.217247	0.228856	0.210614	0.212272	0.190713	0.197347	0.217247	0.195688	0.195688	0.212272	0.200663	0.202322	0.218905	0.230514	0.21393	0.223881	0.217247	0.220564	0.20398
Perla illiesi	0.212272	0.20398	0.220564	0.217247	0.21393	0.227197	0.233831	0.202322	0.220564	0.215589	0.207297	0.200663	0.202322	0.212272	0.207297	0.208955	0.202322	0.202322	0.207297	0.208955	0.212272	0.208955	0.217247	0.212272	0.210614	0.207297	0.218905	0.202322	0.205638	0.20398	0.217247	0.232172	0.207297	0.218905	0.192371	0.197347	0.220564	0.202322	0.195688	0.208955	0.200663	0.205638	0.215589	0.223881	0.21393	0.222222	0.217247	0.223881	0.20398
Perla pallida	0.199005	0.185738	0.208955	0.215589	0.200663	0.215589	0.222222	0.189055	0.21393	0.212272	0.199005	0.18408	0.195688	0.195688	0.190713	0.199005	0.189055	0.199005	0.202322	0.200663	0.197347	0.202322	0.197347	0.205638	0.20398	0.207297	0.200663	0.19403	0.189055	0.189055	0.205638	0.208955	0.195688	0.202322	0.180763	0.182421	0.205638	0.192371	0.170813	0.205638	0.182421	0.185738	0.207297	0.217247	0.192371	0.212272	0.20398	0.218905	0.192371
Perla marginata	0.199005	0.190713	0.208955	0.215589	0.205638	0.207297	0.222222	0.182421	0.208955	0.207297	0.19403	0.187396	0.195688	0.199005	0.197347	0.199005	0.190713	0.202322	0.202322	0.20398	0.195688	0.197347	0.205638	0.20398	0.202322	0.199005	0.202322	0.190713	0.185738	0.192371	0.207297	0.210614	0.207297	0.20398	0.187396	0.187396	0.207297	0.195688	0.185738	0.210614	0.190713	0.187396	0.199005	0.21393	0.190713	0.208955	0.20398	0.21393	0.195688
Perla sp.	0.19403	0.185738	0.208955	0.218905	0.200663	0.20398	0.215589	0.182421	0.210614	0.20398	0.19403	0.182421	0.190713	0.19403	0.190713	0.192371	0.182421	0.199005	0.197347	0.199005	0.195688	0.199005	0.20398	0.20398	0.199005	0.199005	0.205638	0.192371	0.187396	0.190713	0.205638	0.212272	0.208955	0.202322	0.187396	0.18408	0.205638	0.195688	0.180763	0.205638	0.185738	0.179104	0.202322	0.215589	0.192371	0.212272	0.195688	0.215589	0.195688
Perla carantana	0.205638	0.187396	0.212272	0.223881	0.21393	0.21393	0.205638	0.190713	0.210614	0.192371	0.217247	0.190713	0.189055	0.189055	0.202322	0.208955	0.197347	0.205638	0.197347	0.20398	0.217247	0.199005	0.197347	0.208955	0.207297	0.218905	0.199005	0.20398	0.202322	0.210614	0.210614	0.217247	0.200663	0.20398	0.190713	0.19403	0.220564	0.202322	0.19403	0.205638	0.187396	0.199005	0.21393	0.215589	0.199005	0.207297	0.202322	0.212272	0.18408
Dinocras megacephala	0.21393	0.182421	0.195688	0.217247	0.217247	0.215589	0.199005	0.189055	0.192371	0.190713	0.212272	0.223881	0.228856	0.200663	0.20398	0.195688	0.207297	0.20398	0.197347	0.243781	0.190713	0.187396	0.197347	0.208955	0.212272	0.20398	0.212272	0.210614	0.205638	0.215589	0.220564	0.225539	0.225539	0.225539	0.230514	0.217247	0.220564	0.207297	0.208955	0.225539	0.202322	0.200663	0.208955	0.218905	0.195688	0.220564	0.208955	0.217247	0.215589
[truncated: 25 more columns]
