# Supplementary material for: DNA barcoding for biodiversity assessment: Croatian stoneflies (Insecta: Plecoptera)
Source: PeerJ. 2022 Apr 20;10:e13213. doi: 10.7717/peerj.13213 (PMC9034701; doi:10.7717/peerj.13213)
Supplement: Supplemental Information 11 — Additional phylogenetic analyses were performed in several cases: for the species with high level of intraspecific morphological variability and species which differ mainly in taxonomic features from the species described so far. [file peerj-10-13213-s011.xlsx]

## Sheet: Datasets
Dataset 1 (optimal model of nucleotide evolution: HKY+G)
Morphologically identified taxa	Country	Sampling site	BOLD ID/GenBank Acc. No.	Collection date	Publication
Perlodes intricatus	Croatia	Plitvice Lakes, Bijela rijeka, spring	CROPL113-21	2019-06-20	this study
Perlodes intricatus	Croatia	Plitvice Lakes, Crna rijeka	CROPL088-21	2005-06-02	this study
Perlodes intricatus	France	La Volfrine, Conjocle	GBMNB60474-20	2016-05-09	Gauthier et al., 2020
Perlodes intricatus	Switzerland	Robiei, Bavona	PLEAA018-20	2008-07-05	unpublished
Perlodes microcephalus	Germany	Isar Fkm 237, oberhalb Pegel Rissbachdueker	FBAQU339-09	2009-03-31	unpublished
Perlodes microcephalus	Germany	Nationalpark Bayrischer Wald	GBEPT315-14	2011-06-11	Morinière et al., 2017
Perlodes microcephalus	France	Arve, Marignier	GBMNB60448-20	2017-02-25	Gauthier et al., 2020
Perlodes microcephalus	Italy	Torrente Chiarsò	GBMNC47830-20	2009-11-08	Gamboa et al., 2019
Perlodes microcephalus	Italy	Imponzo-Cadunea	GBMNC47838-20	2009-11-04	Gamboa et al., 2019
Perlodes dispar	Croatia	Mikleuš, Voćinska River	CROPL187-21	2020-03-14	this study
Perlodes dispar	Croatia	Čačinci, Vojlovica River	CROPL189-21	2020-03-14	this study
Outgroup:
Leuctra hippopus	Croatia	Zavrh, Kupa River	CROPL002-21	2019-02-28	this study
Dataset 2 (optimal model of nucleotide evolution: TrN+G)
Morphologically identified taxa	Country	Sampling site	BOLD ID/GenBank Acc. No.	Collection date	Authors
Isoperla albanica	Slovenia	Spodnji Dolič	CROPL315-21	2021-05-10	this study
Isoperla albanica	Slovenia	Mala Reka	CROPL317-21	2021-05-09	this study
Isoperla bosnica	Croatia	Čabranka River	CROPL045-21	2011-05-01	this study
Isoperla bosnica	Croatia	Sedalce, Kupa River	CROPL068-21	2004-07-21	this study
Isoperla bosnica	Croatia	Sedalce, Kupa River	CROPL073-21	2004-07-21	this study
Isoperla bosnica	Croatia	Čabranka River	CROPL031-21	2011-05-02	this study
Isoperla cf. lugens	Croatia	Plitvice Lakes, Drakulić rijeka, spring	CROPL127-21	2019-06-20	this study
Isoperla cf. lugens	Croatia	Plitvice Lakes, Drakulić rijeka, spring	CROPL214-21	2020-06-23	this study
Isoperla cf. lugens	Croatia	Bistrac Tounjski, Bistrice Stream	CROPL307-21	2014-06-12	this study
Isoperla cf. lugens	Croatia	Plaški, Dretulja	CROPL310-21	2014-04-19	this study
Isoperla cf. lugens	Croatia	Kupa River, spring	CROPL311-21	2009-07-23	this study
Isoperla cf. lugens	Croatia	Vitunjčica, spring	CROPL312-21	2014-06-12	this study
Isoperla cf. lugens	Croatia	Slunjčica	CROPL332-21	2021-06-03	this study
Isoperla cf. lugens	Slovenia	Podturn, Podturn spring	CROPL335-21	2021-05-28	this study
Isoperla cf. lugens	Croatia	Plitvice Lakes, Drakulić rijeka, spring	CROPL344-21	2021-05-29	this study
Isoperla cf. lugens	Croatia	Plaški, Dretulja	CROPL349-21	2021-05-29	this study
Isoperla cf. lugens	Croatia	Vitunjčica, spring	CROPL352-21	2021-05-29	this study
Isoperla cf. lugens	Slovenia	Poltarica spring, Gradiček	CROPL354-21	2021-05-28	this study
Isoperla difformis	Finland	Myllykoski, Regio aboensis	FIEPT072-11	2011-04-12	Roslin et al., 2022
Isoperla difformis	Finland	Katlakoski, Regio aboensis	FIEPT077-11	2011-04-15	Roslin et al., 2022
Isoperla difformis	Finland	Siuruanjoki, Hirvaskoski	FIEPT136-16	2011-09-21	Roslin et al., 2022
Isoperla difformis	Finland	Siuruanjoki, Hirvaskoski	FIEPT145-16	2011-09-21	Roslin et al., 2022
Isoperla goertzi	Croatia	Ivanščica, Šumi Stream	CROPL368-21	2021-06-25	this study
Isoperla grammatica	Croatia	Pakrac, Pakra River	CROPL154-21	2019-04-14	this study
Isoperla grammatica	Croatia	Žabnik, Mura River	CROPL205-21	2020-05-03	this study
Isoperla grammatica	Croatia	Novakovec, Mura River	CROPL229-21	2020-04-25	this study
Isoperla grammatica	Croatia	Podturen, Mura River	CROPL231-21	2020-04-25	this study
Isoperla grammatica	Croatia	Kusonje, Papuk	CROPL265-21	2021-02-26	this study
Isoperla grammatica	Croatia	Kusonje, Papuk	CROPL276-21	2021-02-26	this study
Isoperla grammatica	Croatia	Kusonje, Papuk	CROPL292-21	2021-03-09	this study
Isoperla grammatica	Slovenia	Štangarske poljane, Reka Stream	CROPL318-21	2021-05-09	this study
Isoperla grammatica	Croatia	Kusonje, Papuk	CROPL338-21	2021-06-03	this study
Isoperla illyrica	Croatia	Grab, spring	CROPL097-21	2005-06-01	this study
Isoperla illyrica	Croatia	Ruda, spring	CROPL122-21	2019-06-22	this study
Isoperla illyrica	Croatia	Ruda, spring	CROPL123-21	2019-06-22	this study
Isoperla illyrica	Croatia	Grab, spring	CROPL197-21	2006-06-01	this study
Isoperla illyrica	Croatia	Roški slap, Krka River	CROPL329-21	2021-05-31	this study
Isoperla illyrica	Croatia	Grab, spring	CROPL364-21	2021-06-13	this study
Isoperla illyrica	Croatia	Grab, spring	CROPL365-21	2021-06-13	this study
Isoperla inermis	Croatia	Cetina River, spring	CROPL036-21	2005-07-22	this study
Isoperla inermis	Croatia	Cetina River, spring	CROPL042-21	2005-06-22	this study
Isoperla inermis	Croatia	Cetina River, Glavaš spring	CROPL111-21	2019-06-22	this study
Isoperla inermis	Croatia	Plitvice Lakes, Bijela rijeka spring	CROPL112-21	2019-06-20	this study
Isoperla inermis	Croatia	Donja Suvaja, Una River	CROPL260-21	2021-02-27	this study
Isoperla inermis	Croatia	Donja Suvaja, Una River	CROPL261-21	2021-02-27	this study
Isoperla inermis	Croatia	Cetina River, Preočani spring	CROPL302-21	2005-06-22	this study
Isoperla inermis	Croatia	Plitvice Lakes, Crna rijeka spring	CROPL303-21	2019-06-20	this study
Isoperla inermis	Croatia	Ruda, spring	CROPL304-21	2007-06-06	this study
Isoperla inermis	Croatia	Ruda, spring	CROPL343-21	2021-05-30	this study
Isoperla inermis	Croatia	Cetina River, Preočani spring	CROPL346-21	2021-05-31	this study
Isoperla inermis	Croatia	Plaški, Dretulja	CROPL353-21	2021-05-29	this study
Isoperla inermis	Croatia	Cetina River, Preočani spring	CROPL360-21	2021-06-14	this study
Isoperla rivulorum	Croatia	Kupa River, spring	CROPL066-21	2004-07-20	this study
Isoperla rivulorum	Slovenia	Koprivna, Črna na Koroškem	CROPL180-21	2010-07-01	this study
Isoperla rivulorum	Croatia	Kupa River, spring	CROPL306-21	2004-07-20	this study
Isoperla rivulorum	Slovenia	Matkov Kot	CROPL314-21	2021-05-10	this study
Isoperla popijaci	Croatia	Ševerova cave	CROPL115-21	2019-06-21	this study
Isoperla popijaci	Croatia	Ševerova cave	CROPL232-21	2019-06-21	this study
Isoperla tripartita	Croatia	Cetina River, Preočani spring	CROPL109-21	2019-06-22	this study
Isoperla tripartita	Croatia	Papuk, Gospin potok	CROPL225-21	2020-07-02	this study
Isoperla tripartita	Croatia	Bilogora, Ribnjačka, Žirovnjak Stream	CROPL301-21	2014-06-06	this study
Isoperla tripartita	Croatia	Grab, spring	CROPL363-21	2021-06-13	this study
Outgroup:
Leuctra hippopus	Croatia	Zavrh, Kupa River	CROPL002-21	2019-02-28	this study
Dataset 3 (optimal model of nucleotide evolution: HKY+G)
Morphologically identified taxa	Country	Sampling site	BOLD ID/GenBank Acc. No.	Collection date	Authors
Isoperla cf. lugens	Croatia	Plitvice Lakes, Drakulić rijeka, spring	CROPL127-21	2019-06-20	this study
Isoperla cf. lugens	Croatia	Plaški, Dretulja	CROPL310-21	2014-04-19	this study
Isoperla cf. lugens	Croatia	Vitunjčica, spring	CROPL312-21	2014-06-12	this study
Isoperla cf. lugens	Croatia	Slunjčica	CROPL332-21	2021-06-03	this study
Isoperla illyrica	Croatia	Grab, spring	CROPL097-21	2005-06-01	this study
Isoperla illyrica	Croatia	Grab, spring	CROPL197-21	2006-06-01	this study
Isoperla lugens	Germany	Nationalpark Berchtesgaden	GBMIX2517-15	2015-07-16	Morinière et al., 2017
Isoperla lugens	Austria	Koerbersee	INTAP025-17	2015-08-22	unpublished
Isoperla lugens	Austria	Flexenpass	INTAP227-17	2015-08-20	unpublished
Isoperla pesici	Montenegro	Redice	VJOSA007-17	2009-06-01	Graf et al., 2018
Isoperla pesici	Montenegro	Redice	VJOSA008-17	2009-06-01	Graf et al., 2018
Isoperla rivulorum	Croatia	Kupa River, spring	CROPL066-21	2004-07-20	this study
Isoperla rivulorum	France	Notre Dame du pre, Hauteville	GBCOU1198-13	2013-06-15	Morinière et al., 2017
Isoperla rivulorum	Austria	Flexenpass	INTAP187-17	2015-08-20	unpublished
Isoperla rivulorum	Austria	Flexenpass	INTAP226-17	2015-08-20	unpublished
Isoperla rivulorum	Switzerland	Affluent, Pont de Nant	PLEAA237-20	2008-07-06	unpublished
Isoperla popijaci	Croatia	Ševerova cave	CROPL115-21	2019-06-21	this study
Isoperla popijaci	Croatia	Ševerova cave	CROPL232-21	2019-06-21	this study
Isoperla tripartita	Croatia	Cetina River, Preočani spring	CROPL109-21	2019-06-22	this study
Isoperla tripartita	Croatia	Cetina River, spring	CROPL195–21	2005-06-22	this study
Isoperla tripartita	Croatia	Papuk, Gospin potok	CROPL225-21	2020-07-02	this study
Isoperla tripartita	Croatia	Grab, spring	CROPL122–21	2019-06-22	this study
Isoperla tripartita	Austria	Gütenbach	VJOSA001-17	2016-06-11	Graf et al., 2018
Isoperla tripartita	Austria	Katzengraben	VJOSA002-17	2016-06-11	Graf et al., 2018
Isoperla vjosae	Albania	Vjosa River, Kutë	VJOSA003-17	2017-04-25	Graf et al., 2018
Isoperla vjosae	Albania	Vjosa River, Kutë	VJOSA004-17	2017-04-25	Graf et al., 2018
Outgroup:
Leuctra hippopus	Croatia	Zavrh, Kupa River	CROPL002-21	2019-02-28	this study
Dataset 4 (optimal model of nucleotide evolution: HKY+G)
Morphologically identified taxa	Country	Sampling site	BOLD ID/GenBank Acc. No.	Collection date	Authors
Protonemura auberti	Germany	Quellen Hohlbauernwaldbach 1,5 km SW Oberbreitenau	FBAQU199-09	2009-07-03	unpublished
Protonemura auberti	Germany	Nationalpark Berchtesgaden	GBEPT1062-14	2014-07-02	Morinière et al., 2017
Protonemura auberti	Germany	Nationalpark Berchtesgaden	GBEPT1064-14	2014-07-02	Morinière et al., 2017
Protonemura auberti	Germany	Nationalpark Berchtesgaden	GBEPT1996-14	2014-07-01	Morinière et al., 2017
Protonemura hrabei	Croatia	Zrmanja River, spring	CROPL034-21	2007-10-13	this study
Protonemura hrabei	Croatia	Zrmanja River, spring	CROPL069-21	2007-10-08	this study
Protonemura hrabei	Croatia	Cetina River, Preočani spring	CROPL345-21	2021-05-31	this study
Protonemura hrabei	Austria	Zuers	INTAP232-17	2014-10-16	unpublished
Protonemura hrabei	Austria	Zuers	INTAP173-17	2014-10-16	unpublished
Protonemura intricata	Germany	Arzbach a.d. Strassenquerung	FBAQU755-10	2009-07-16	unpublished
Protonemura intricata	Germany	Breitenbach (First-order stream)	GBEPT516-14	2013-05-15	Morinière et al., 2017
Protonemura lateralis	Germany	Quellbach (des Pfanngrabens) bei der Kuempfl-Alm	FBAQU1326-12	2012-07-01	Morinière et al., 2017
Protonemura lateralis	France	Notre Dame du pre, Hauteville	GBCOU1195-13	2013-06-15	Morinière et al., 2017
Protonemura lateralis	France	Notre Dame du pre, Hauteville	GBEPT193-13	2013-06-15	Morinière et al., 2017
Protonemura praecox	Germany	Grosse Ohe Taferlruck 3,7 km NNO Riedlhuette	FBAQU1327-12	2011-04-10	Morinière et al., 2017
Protonemura praecox	France	La Valserine	GBMNB60477-20	2016-02-19	Gauthier et al., 2020
Outgroup:
Leuctra hippopus	Croatia	Zavrh, Kupa River	CROPL002-21	2019-02-28	this study
Dataset 5 (optimal model of nucleotide evolution: HKY+G)
Morphologically identified taxa	Country	Sampling site	BOLD ID/GenBank Acc. No.	Collection date	Authors
Taeniopteryx nebulosa	United Kingdom	Welland, Tinwell Mill	DTNHM963-21	2013-11-25	unpublished
Taeniopteryx auberti	Germany	Grosse Ohe Taferlruck 3,7 km NNO Riedlhuette	FBAQU1328-12	2011-04-10	Morinière et al., 2017
Taeniopteryx kuehtreiberi	Germany	Arzbach oh Untermberg/Arzach	FBAQU1329-12	19-Feb--11	Morinière et al., 2017
Taeniopteryx schoenemundi	Germany	Attel bei Elend (Gde. Wasserburg am Inn)	FBAQU758-10	2009-03-01	unpublished
Taeniopteryx schoenemundi	France	Durance River	GBMIN91156-17		Corse et al., 2017
Taeniopteryx schoenemundi	Germany	Lkr. Berchtesgadener Land	GBMIX1677-15	2010-03-24	Morinière et al., 2017
Taeniopteryx hubaulti	France	Le Paradis	GBMNB60426-20	2017-03-03	Gauthier et al., 2020
Taeniopteryx schoenemundi	France	Tardes	GBMNB60458-20	2017-03-03	Gauthier et al., 2020
Taeniopteryx hubaulti	Switzerland	Thur, Krummenau Hoggli	PLEAA235-20	2013-03-01	unpublished
Taeniopteryx kuehtreiberi	Switzerland	Thur, Nesslau, Giessenfall	PLEAA257-20	2013-03-16	unpublished
Taeniopteryx auberti	Romania	Doda Pilii	RODI033-20	2019-11-08	unpublished
Taeniopteryx n.sp. CRO-1	Croatia	Plitvice Lakes, Crna rijeka spring	CROPL321-21	2019-03-16	this study
Taeniopteryx hubaulti	Croatia	Muta, Mučka Bistrica	CROPL316-21	2008-02-19	this study
Taeniopteryx schoenemundi	Croatia	Kusonje, Papuk	CROPL270-21	2021-02-26	this study
Taeniopteryx nebulosa	Croatia	Rastoke	CROPL253-21	2021-02-22	this study
Taeniopteryx schoenemundi	Croatia	Kusonje, Papuk	CROPL289-21	2021-03-09	this study
Taeniopteryx nebulosa	Croatia	Čačinci, Vojlovica River (Papuk)	CROPL267-21	2021-02-26	this study
Taeniopteryx n.sp. CRO-1	Croatia	Donja Suvaja, Una River	CROPL081-21	2015-03-31	this study
Taeniopteryx n.sp. CRO-1	Croatia	Donja Suvaja, Una River	CROPL078-21	2015-03-31	this study
Taeniopteryx n.sp. CRO-1	Croatia	Vitunjčica, spring	CROPL064-21	2015-03-30	this study
Outgroup:
Leuctra hippopus	Croatia	Zavrh, Kupa River	CROPL002-21	2019-02-28	this study
Dataset 6 (optimal model of nucleotide evolution: TrN+G)
Morphologically identified taxa	Country	Sampling site	BOLD ID/GenBank Acc. No.	Collection date	Authors
Besdolus imhoffi	Croatia	Čikotina lađa, Cetina River	CROPL193-32	2005-06-21	this study
Besdolus imhoffi	Croatia	Kuljani, Una River	CROPL358-21	2021-06-03	this study
Besdolus imhoffi	Croatia	Čikotina lađa, Cetina River	CROPL037-21	2005-07-21	this study
Besdolus ravizzarum	France		GBMH16556-19		Corse et al., 2017
Besdolus illyricus	Montenegro	Donja Polja: Zoljski ljevak	GBMH8633-13	2010-04-12	Fochetti et al., 2011
Besdolus bicolor	Spain	River Borosa	GBMIN18713-13	2009-02-04	Fochetti et al., 2011
Besdolus ventralis	Hungary	Rába River	GBMIN18714-13	2010-04-08	Fochetti et al., 2011
Besdolus illyricus	Montenegro	Donja Polja: Zoljski ljevak	GBMIN18716-13	2010-04-12	Fochetti et al., 2011
Besdolus ravizzarum	Italy	Curone stream	GBMIN18722-13	2010-04-06	Fochetti et al., 2011
Besdolus bicolor	Spain	River Cacín	GBMIN18724-13	2008-12-18	Fochetti et al., 2011
Besdolus imhoffi	Germany	Grosse Lauter at Lauterach	GBMIN18727-13	1999-05-05	Fochetti et al., 2011
Outgroup:
Leuctra hippopus	Croatia	Zavrh, Kupa River	CROPL002-21	2019-02-28	this study

## Sheet: References
Gauthier M, Konecny-Dupré L, Nguyen A, Elbrecht V, Datry T, Douady C, Lefébure T. 2020. Enhancing DNA metabarcoding performance and applicability with bait capture enrichment and DNA from conservative ethanol. Molecular Ecology Resources 20:79–96
Morinière J, Hendrich L, Balke M, Beermann AJ, König T, Hess M, Koch S, Müller R, Leese F, Hebert PDN, Hausmann A, Schubart CD, Haszprunar G. 2017. A DNA barcode library for Germany′s mayflies, stoneflies and caddisflies (Ephemeroptera, Plecoptera and Trichoptera). Molecular Ecology Resources 17(6):1293–1307
Gamboa M, Serrana J, Takemon Y, Monaghan MT, Watanabe K. 2019. Spatial and phylogenetic structure of Alpine stonefly community assemblages across seven habitats using DNA-species. bioRxiv 765578
Roslin T, Somervuo P, Pentinsaari M, Hebert PDN, Agda J, Ahlroth P, Anttonen P, Aspi J, Blagoev G, Blanco S, Chan D, Clayhills T, deWaard J, deWaard S, Elliot T, Elo R, Haapala S, Helve E, Ilmonen J et al. 2022. A molecular-based identification resource for the arthropods of Finland. Molecular Ecology Resources 22:803–822
Graf W, Pauls SU, Vitecek S. 2018. Isoperla vjosae sp. n., a new species of the Isoperla tripartita group from Albania (Plecoptera: Perlodidae). Zootaxa 4370(2):171–179
Corse E, Meglécz E, Archambaud G, Ardisson M, Martin JF, Tougard C, Chappaz R, Dubut V. 2017. A from-benchtop-to-desktop workflow for validating HTS data and for taxonomic identification in diet metabarcoding studies. Molecular Ecology Resources 17(6):e146-e159
Fochetti R, Gaetani B, Fenoglio S, Bo T, López-Rodríguez MJ, Tierno de Figueroa JM. 2011. Systematics and biogeography of the genus Besdolus Ricker, 1952 (Plecoptera, Perlodidae): molecules do not match morphology. Zootaxa 3067:49–58
