# Supplementary material for: DNA barcoding for biodiversity assessment: Croatian stoneflies (Insecta: Plecoptera)
Source: PeerJ journal article supplement (doi:10.7717/peerj.13213), 2022-04-20
Supplement: Supplemental_Data_S1.pdf [file Supplemental_Data_S1.pdf]

1

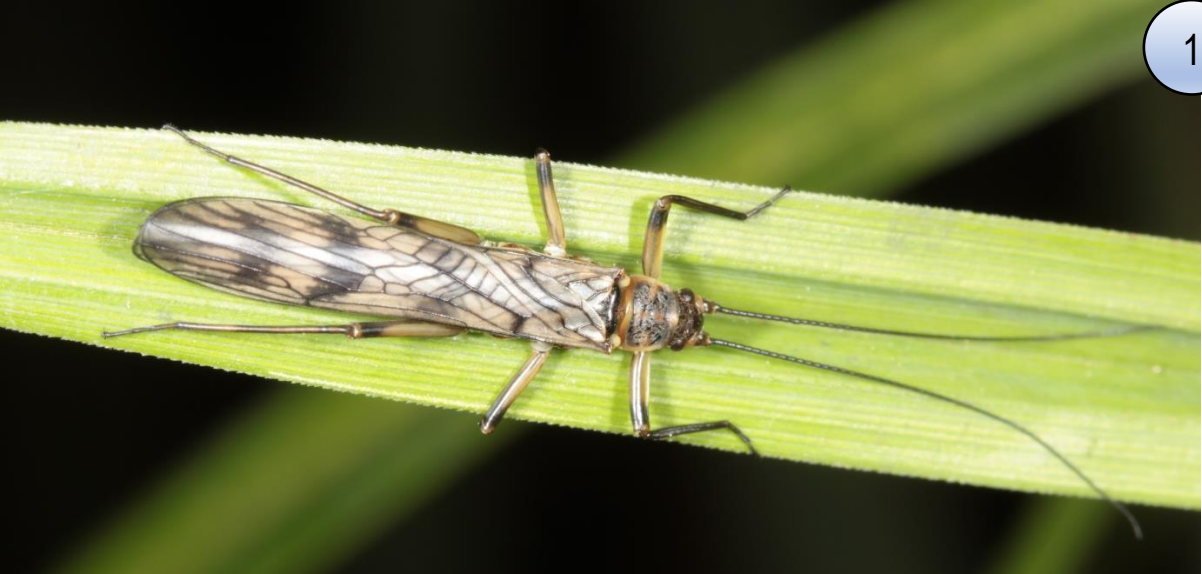

2

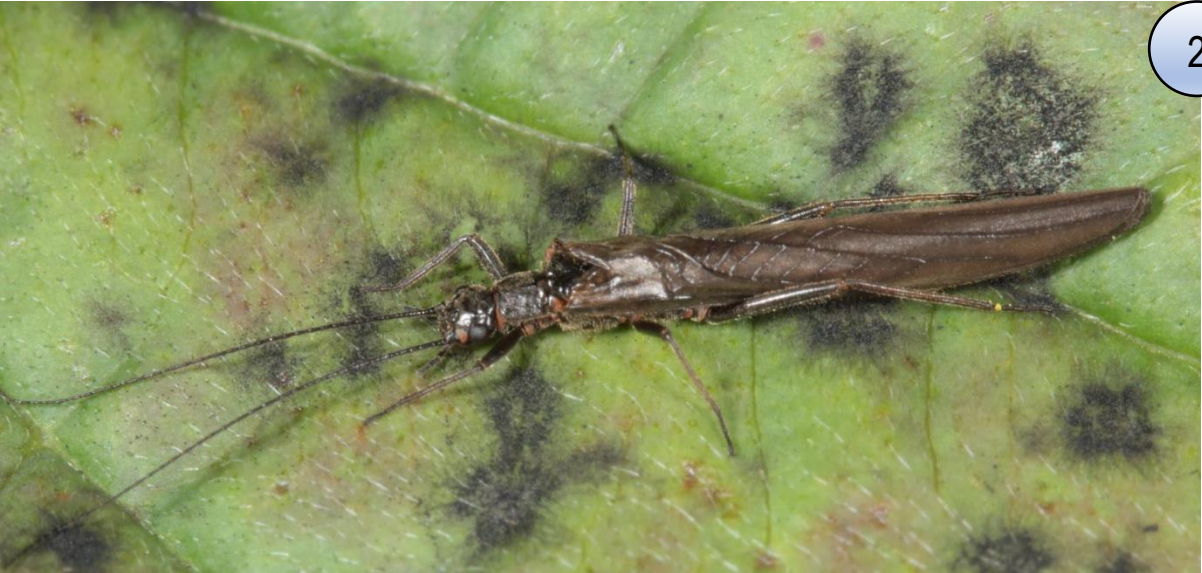

3

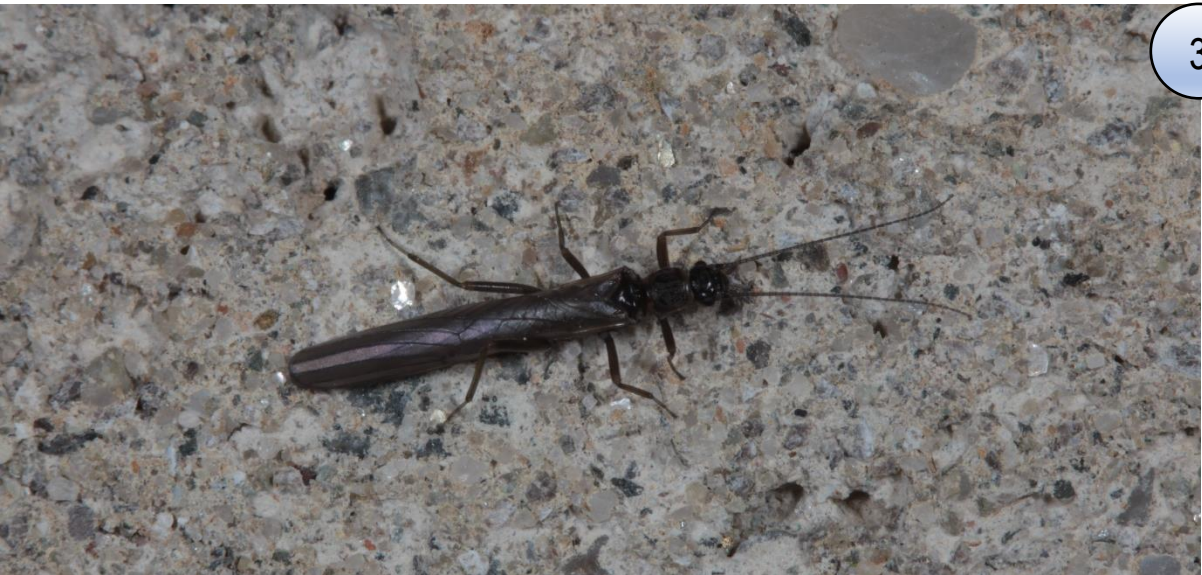

4

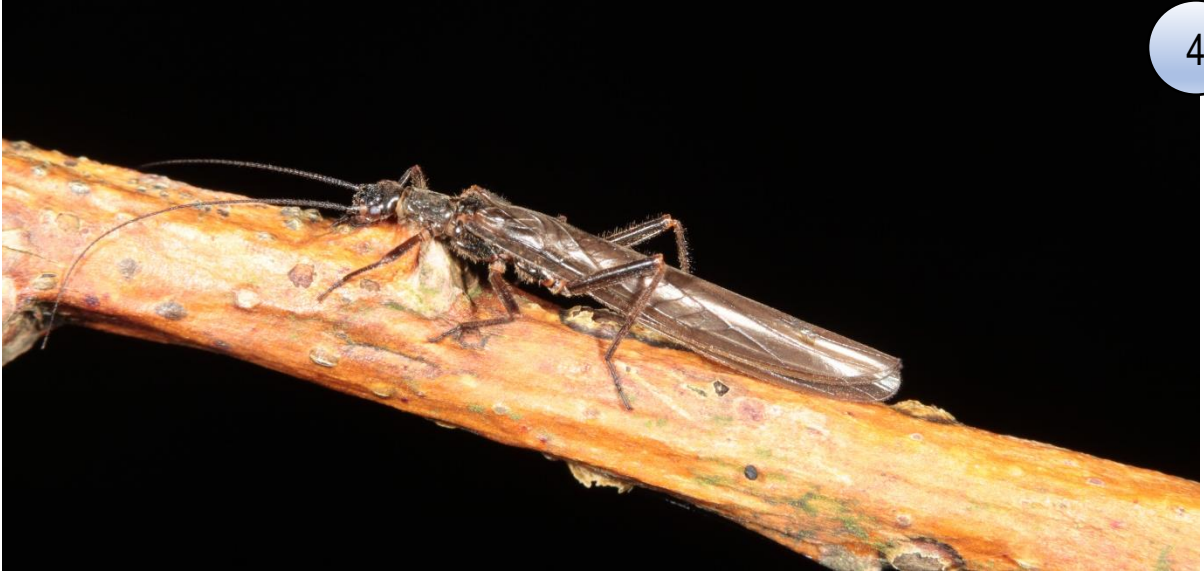

5

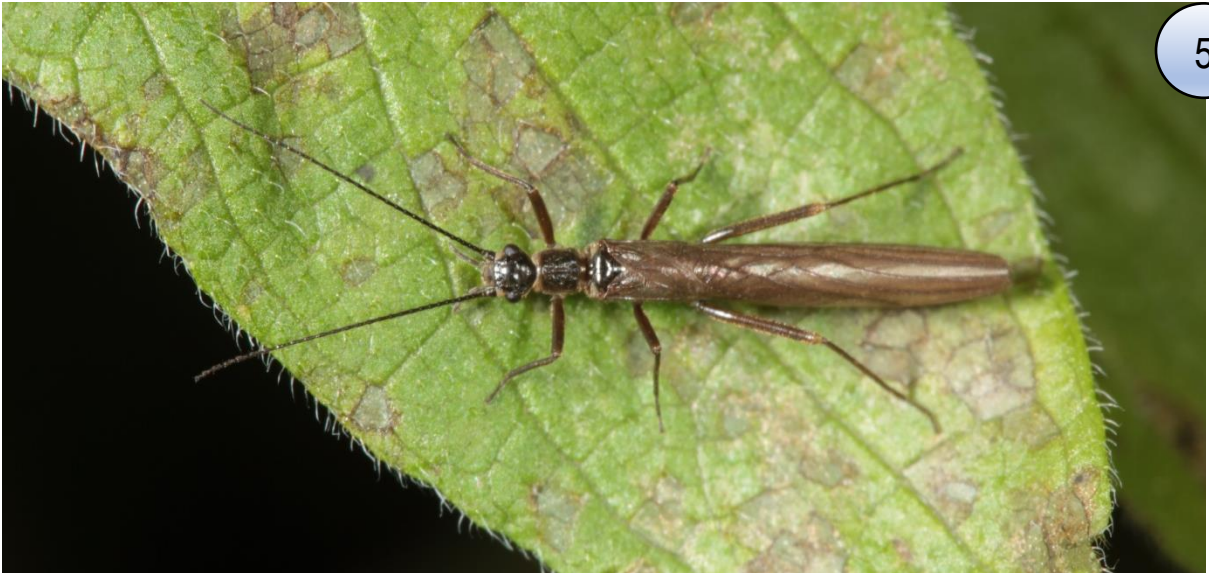

6

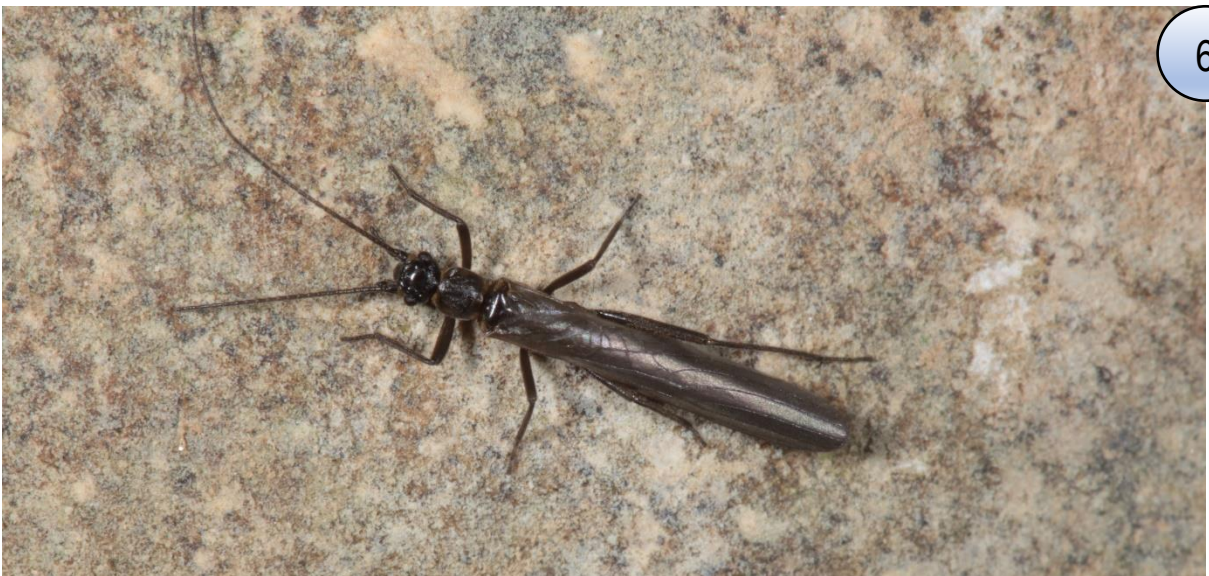

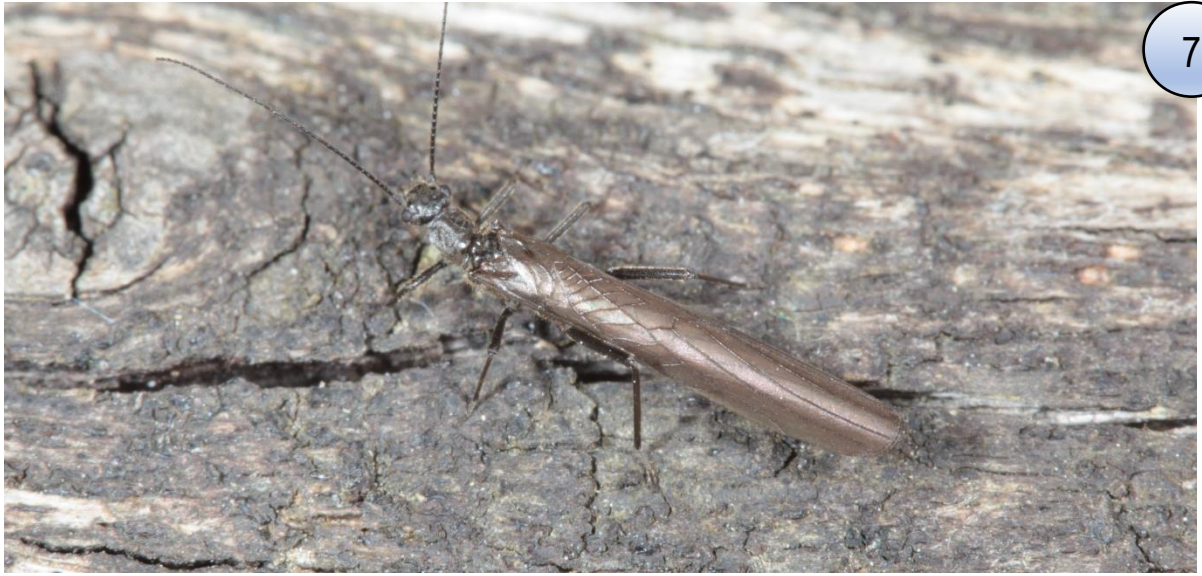

7

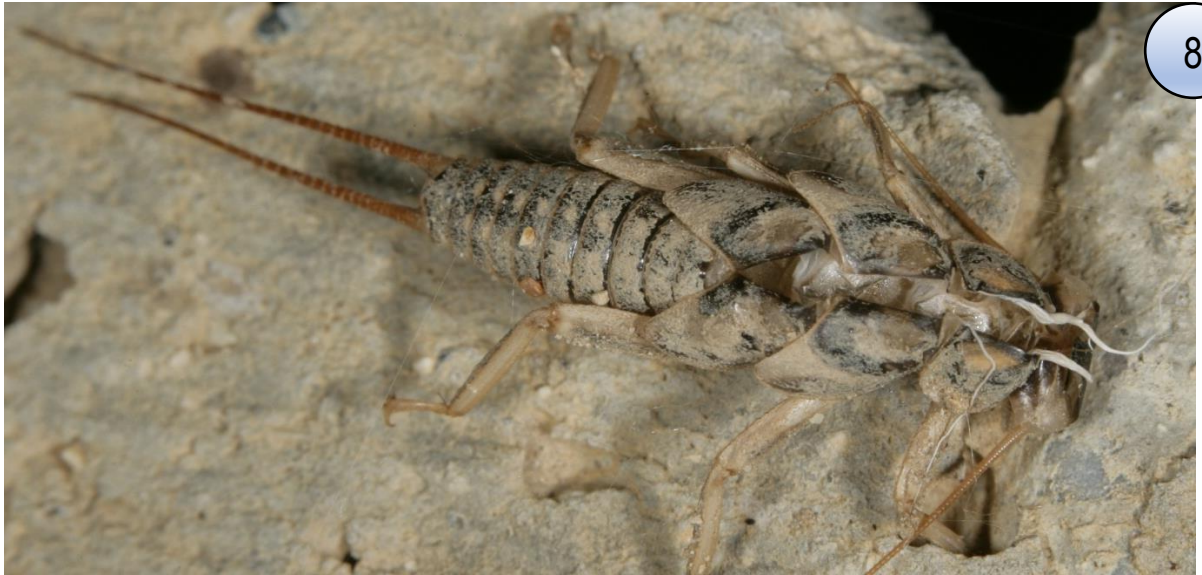

8

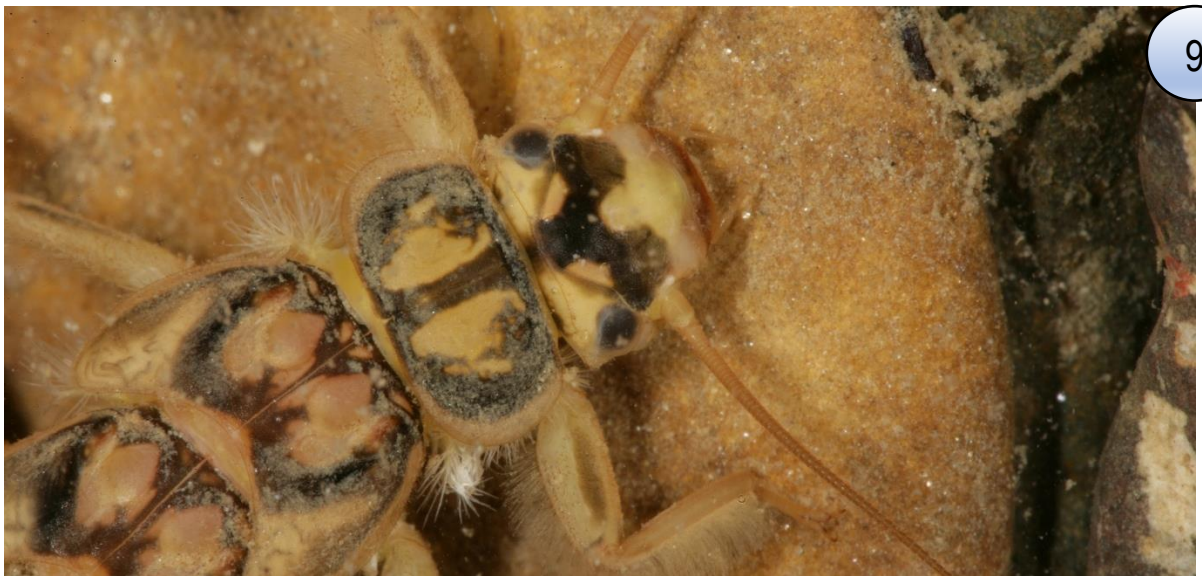

9

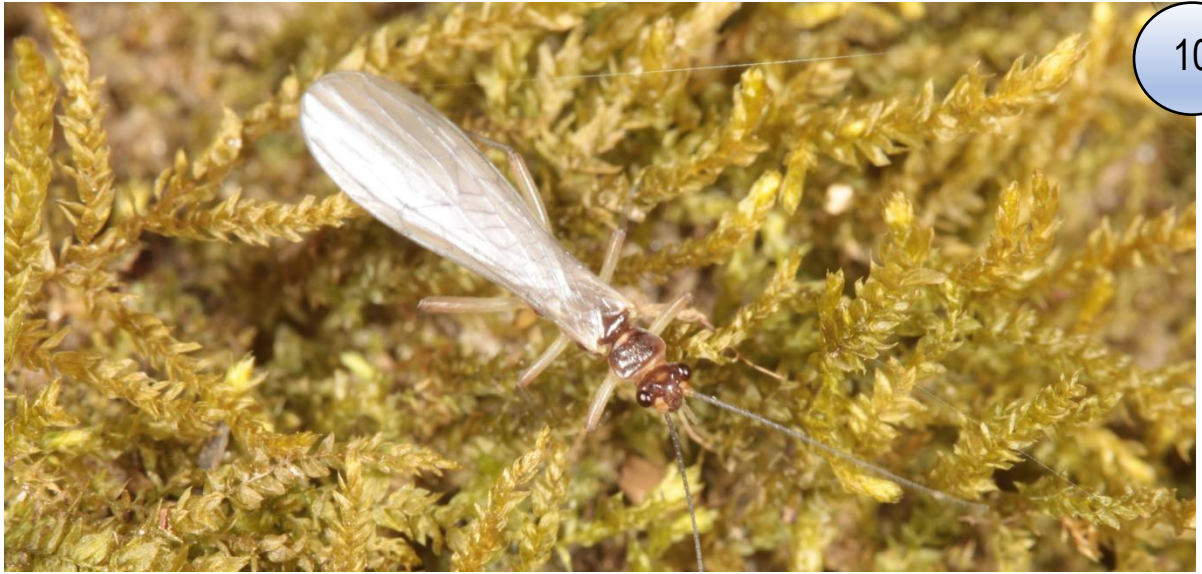

10

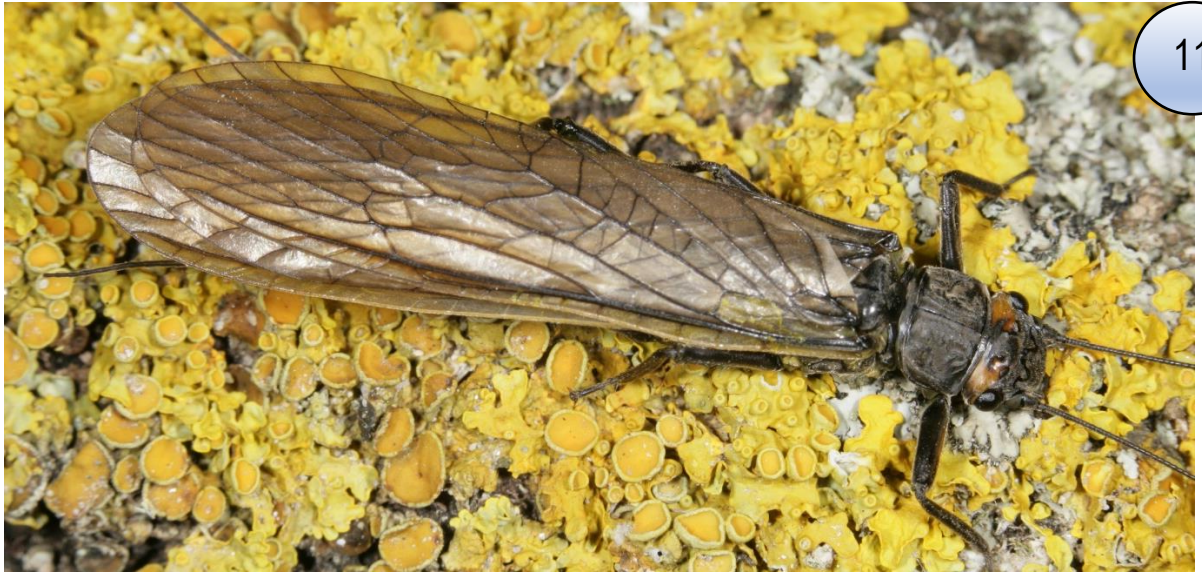

11

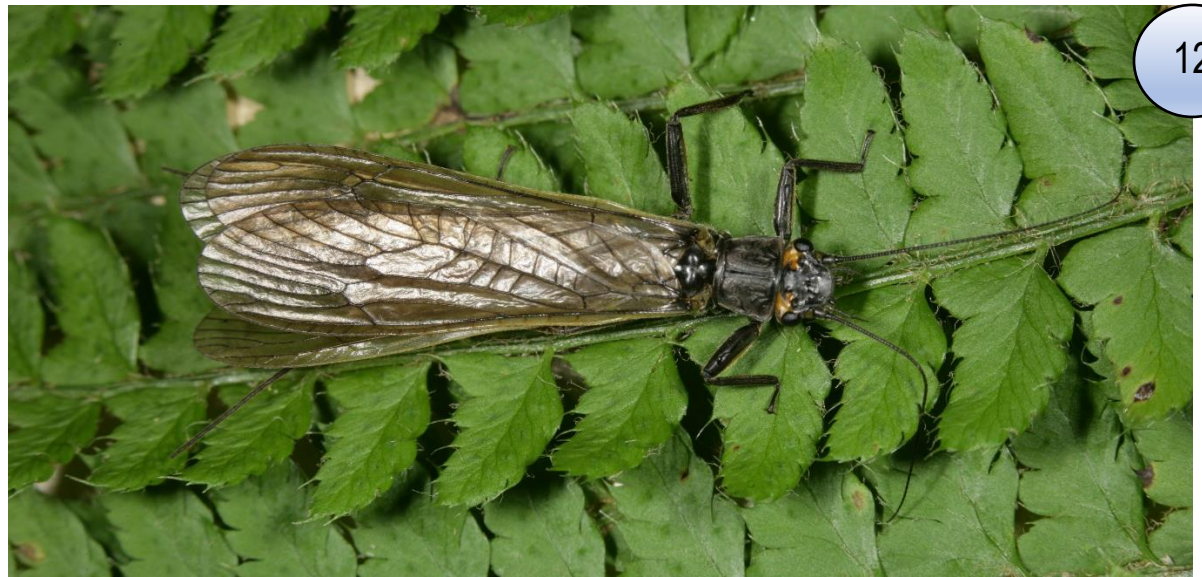

12

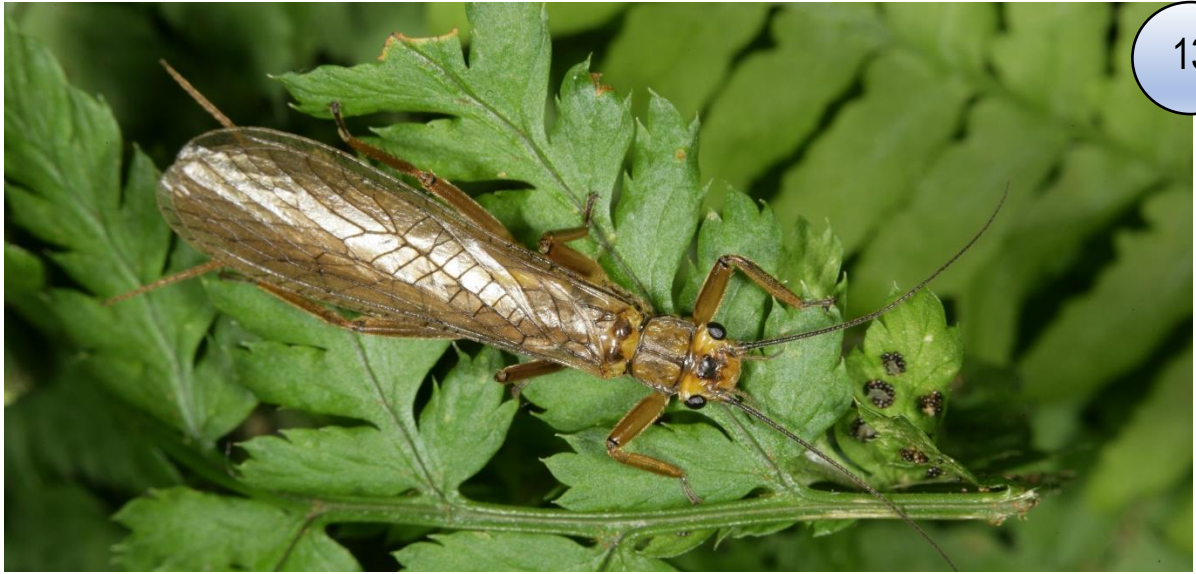

13

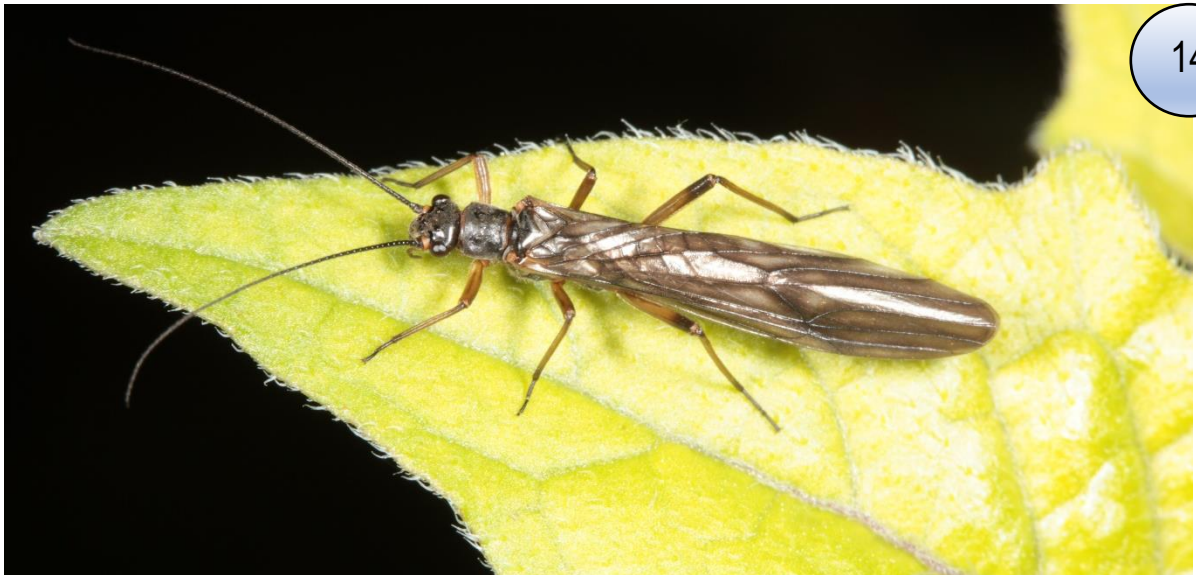

14

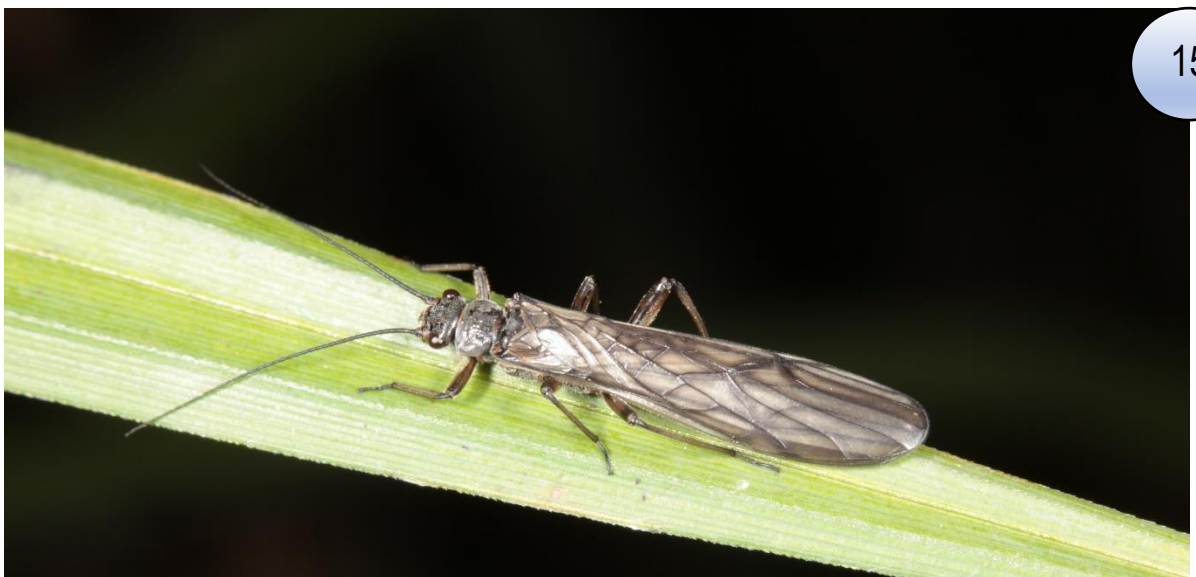

15

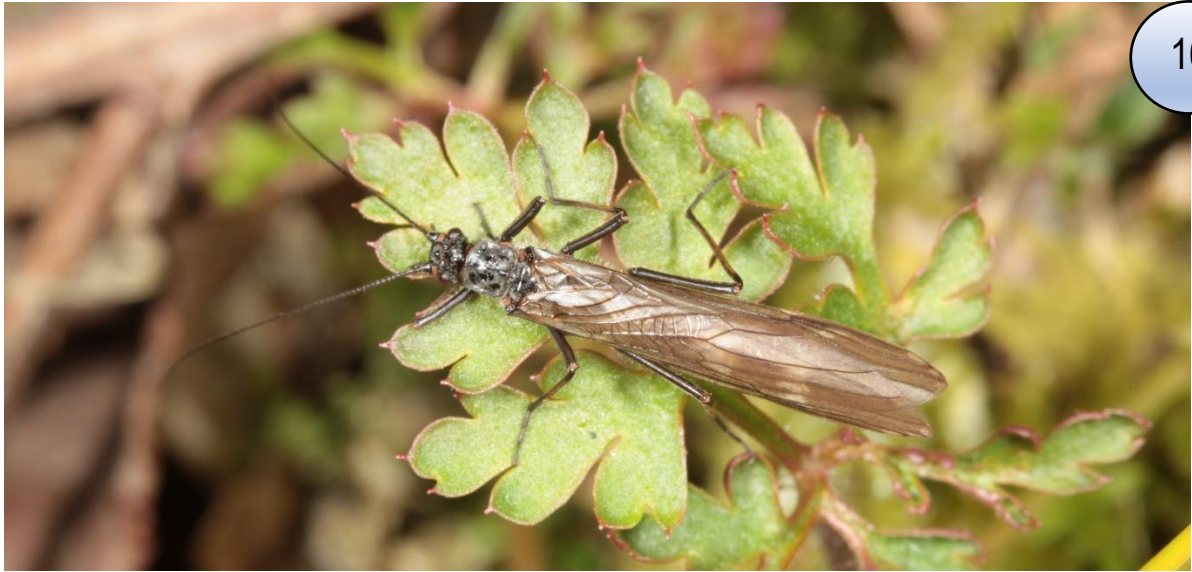

16

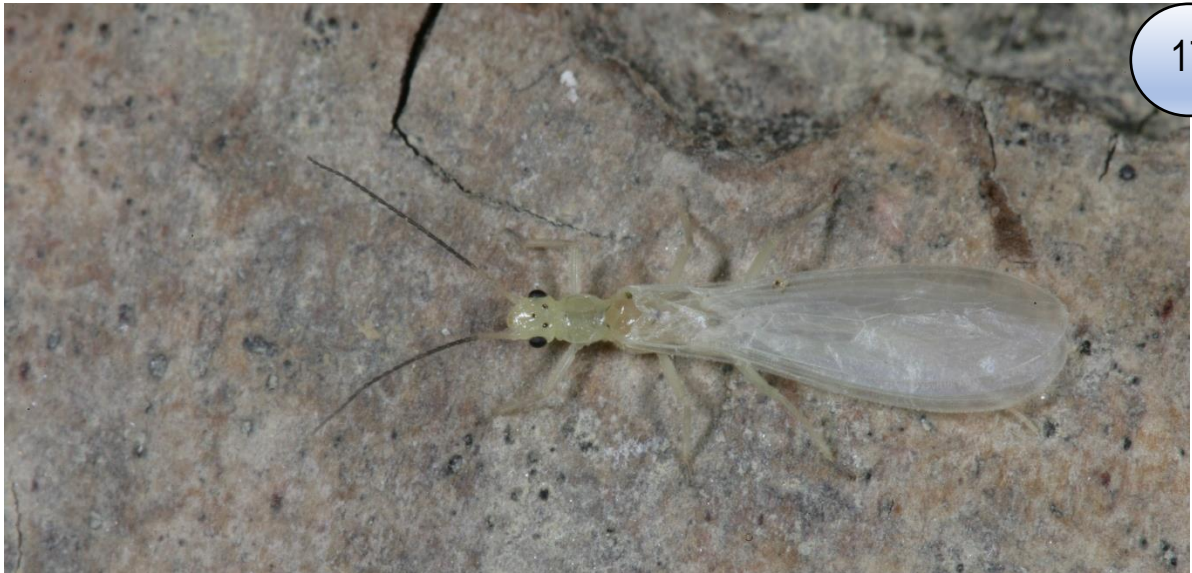

17

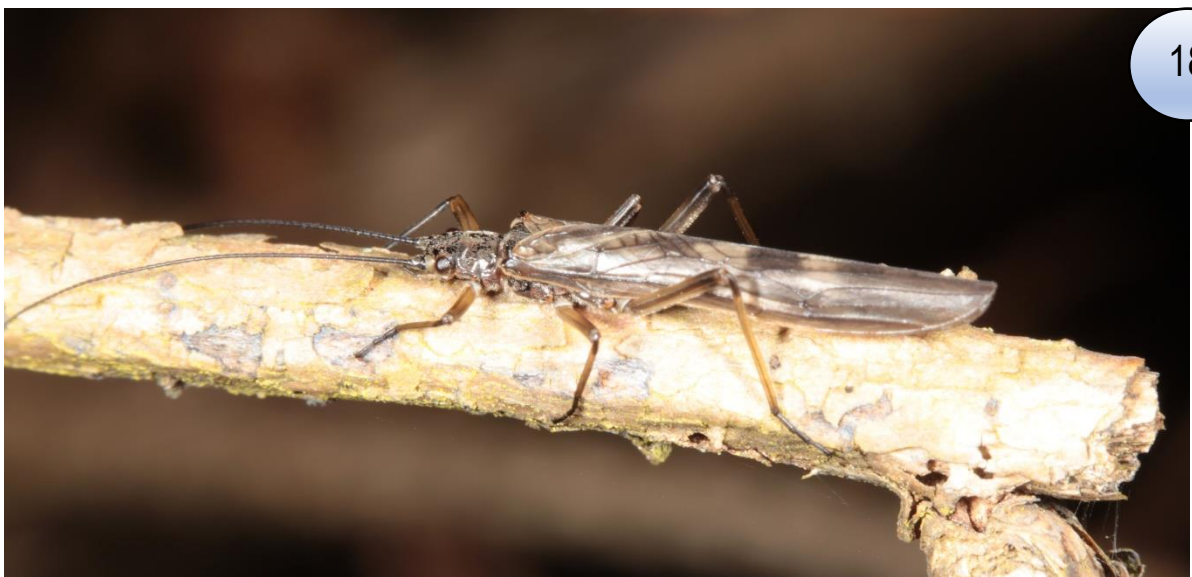

18

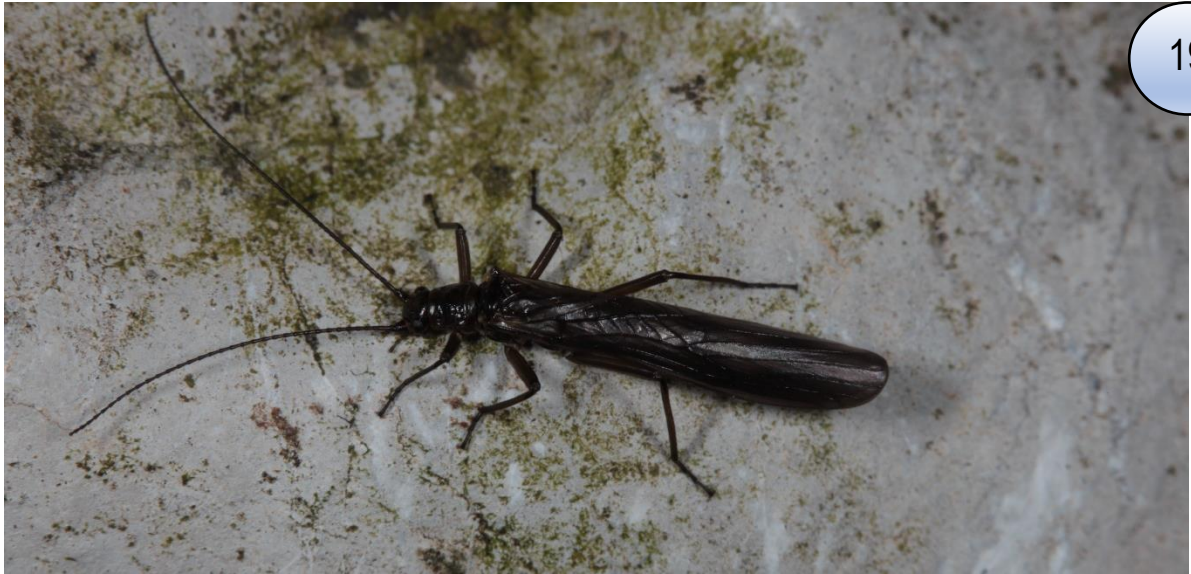

19

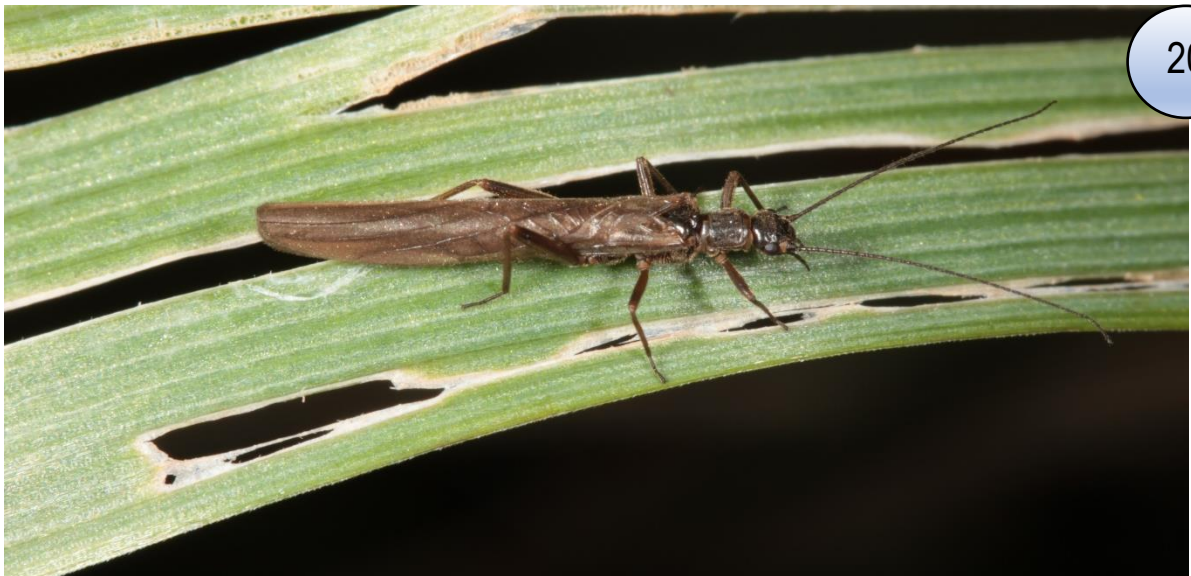

20

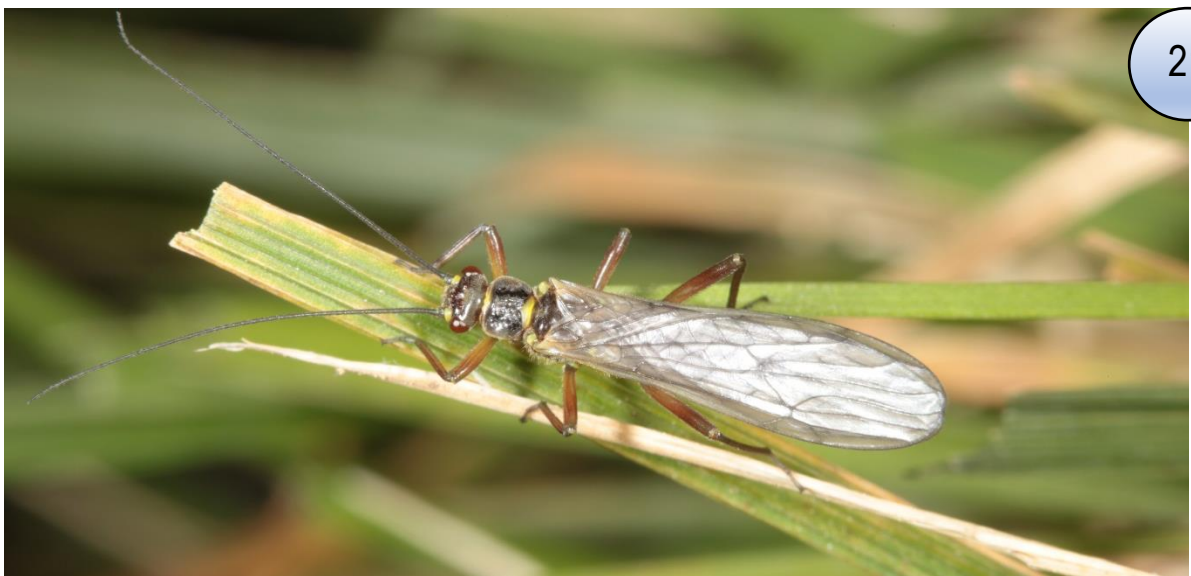

21

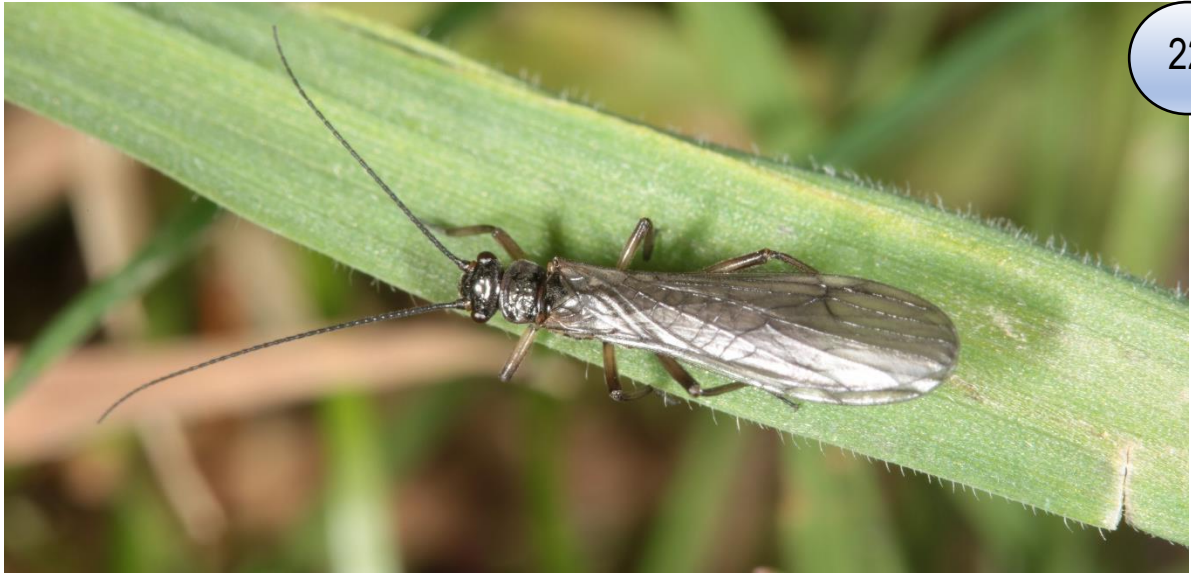

22

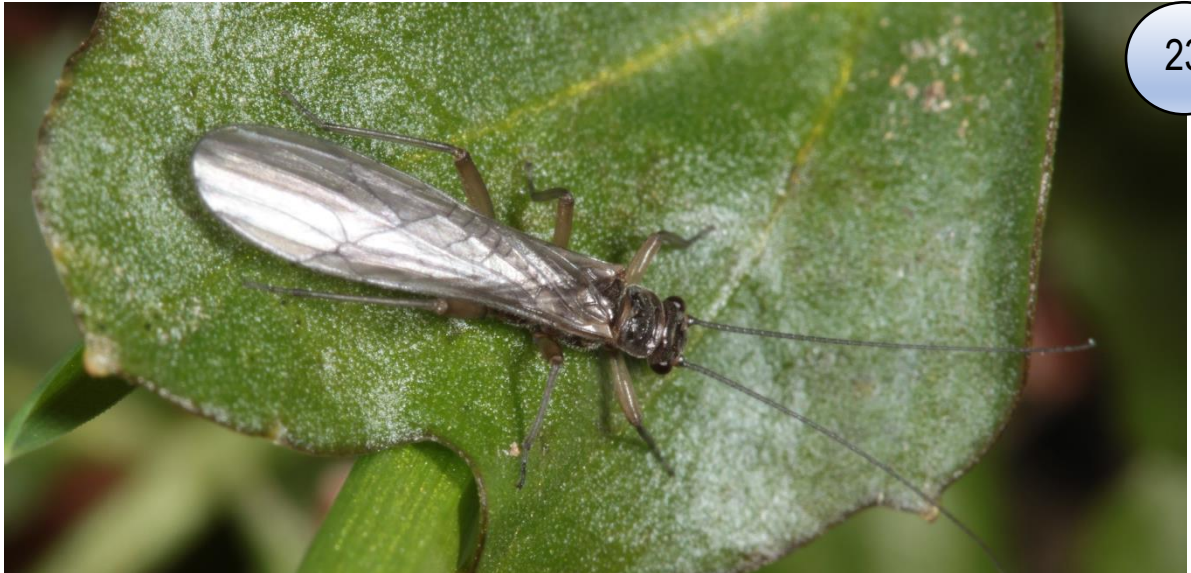

23

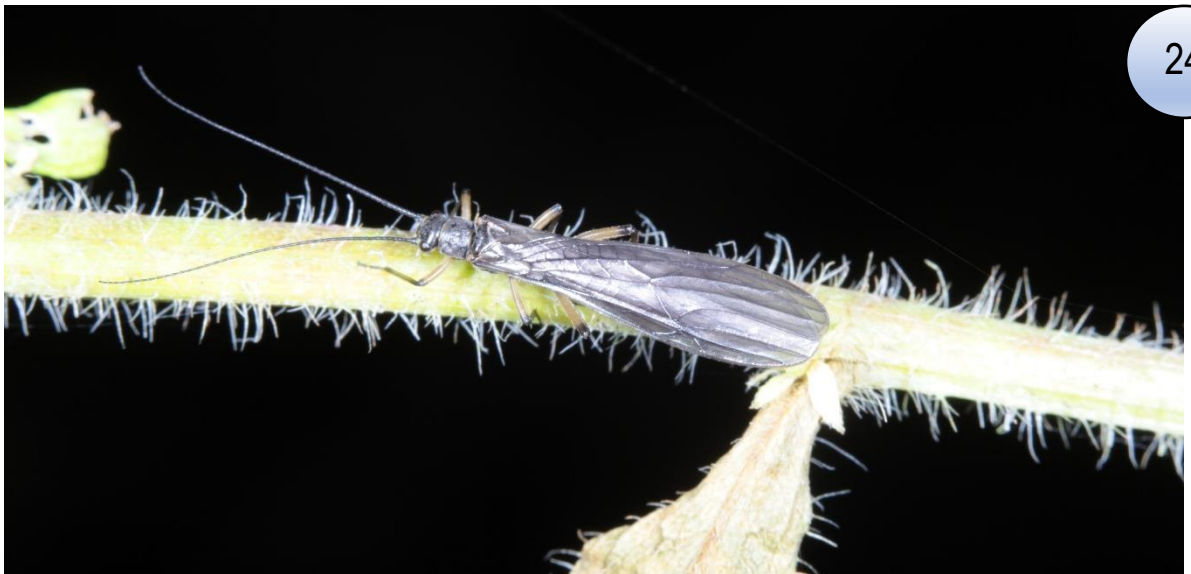

24



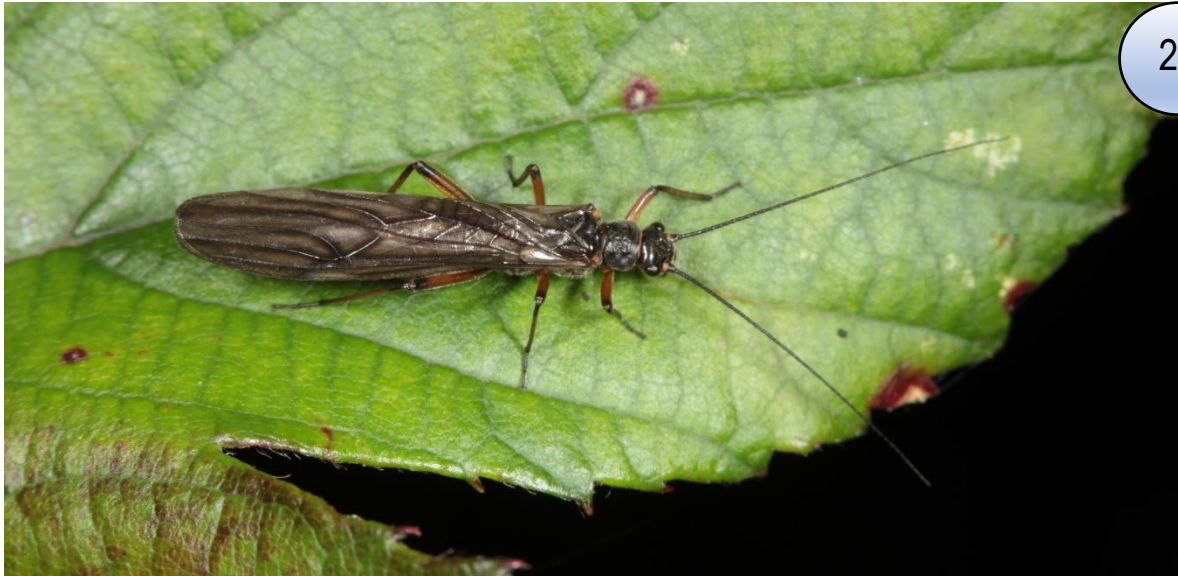

25

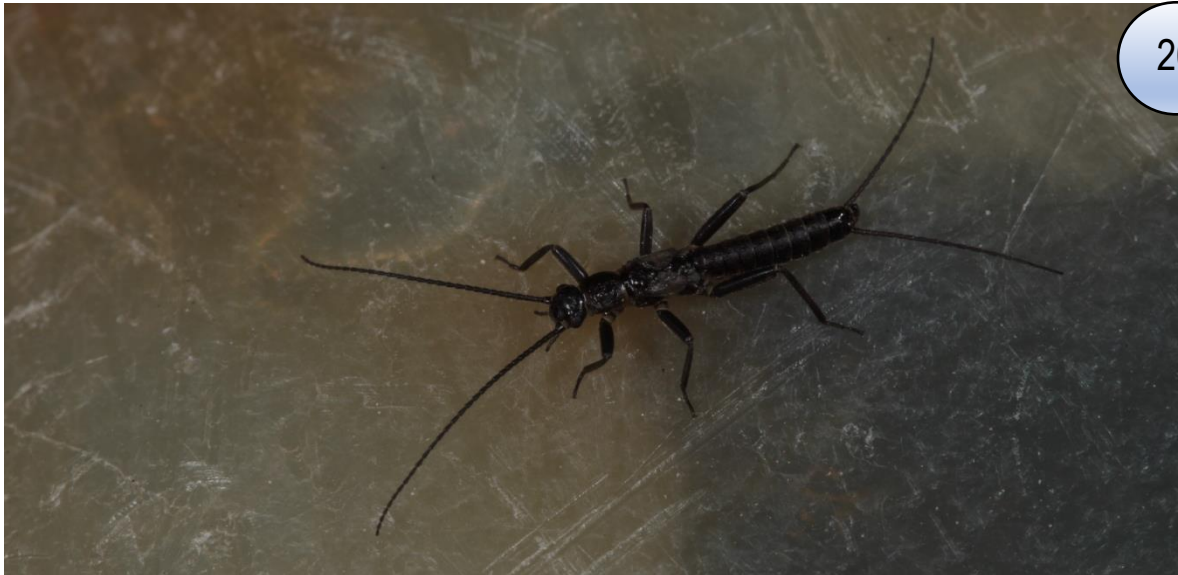

26
